# Supplementary material
Source: publisher figshare collection journal article supplement (https://geolsoc.figshare.com/articles/dataset/_/3453284)
Supplement: Supplementary file 1 [file 1]

| Time (Ma) | Temp. (°C) |
|-----------|------------|
| 20        | 309        |
| 19.5      | 308        |
| 19        | 306        |
| 18.5      | 304        |
| 18        | 303        |
| 17.5      | 300        |
| 17        | 294        |
| 16.5      | 290        |
| 16        | 287        |
| 15.5      | 283        |
| 15        | 280        |
| 14.5      | 277        |
| 14        | 274        |
| 13.5      | 272        |
| 13        | 268        |
| 12.5      | 264        |
| 12        | 258        |
| 11.5      | 248        |
| 11        | 237        |
| 10.5      | 223        |
| 10        | 206        |
| 9.5       | 185        |
| 9         | 160        |
| 8.5       | 140        |

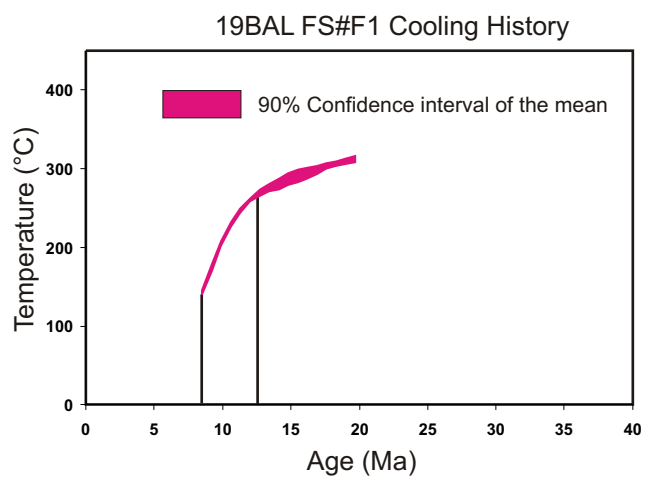

**A1**

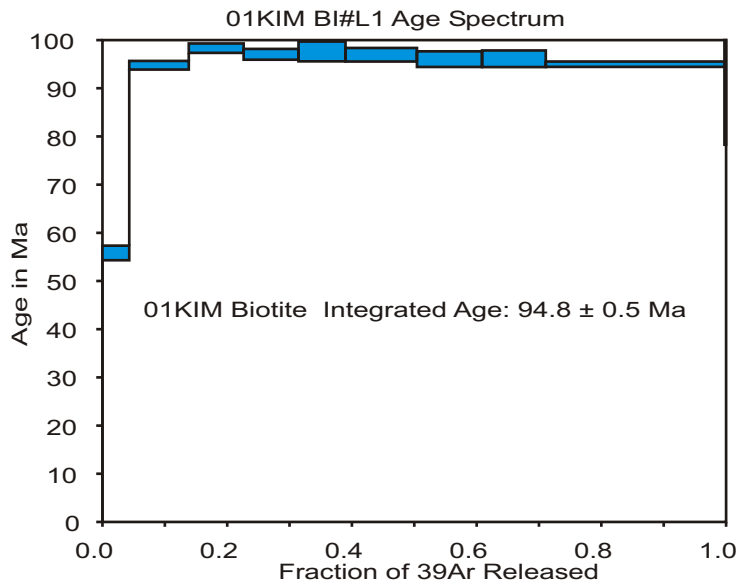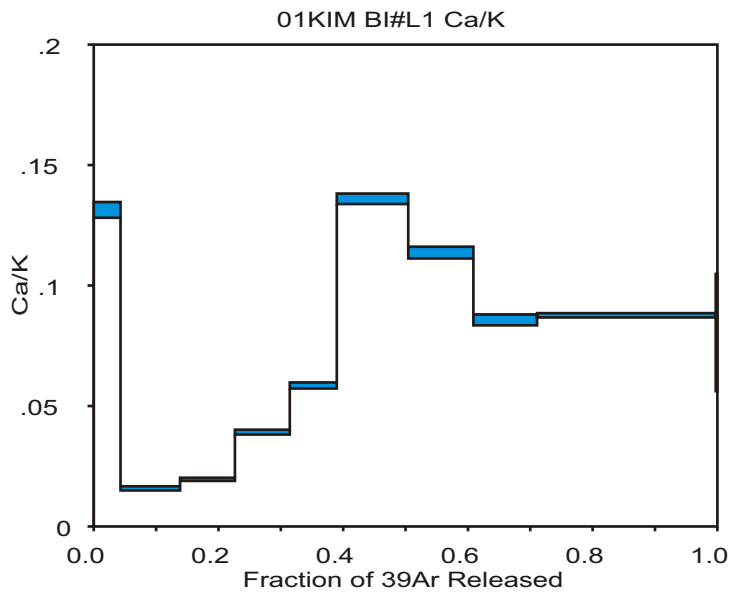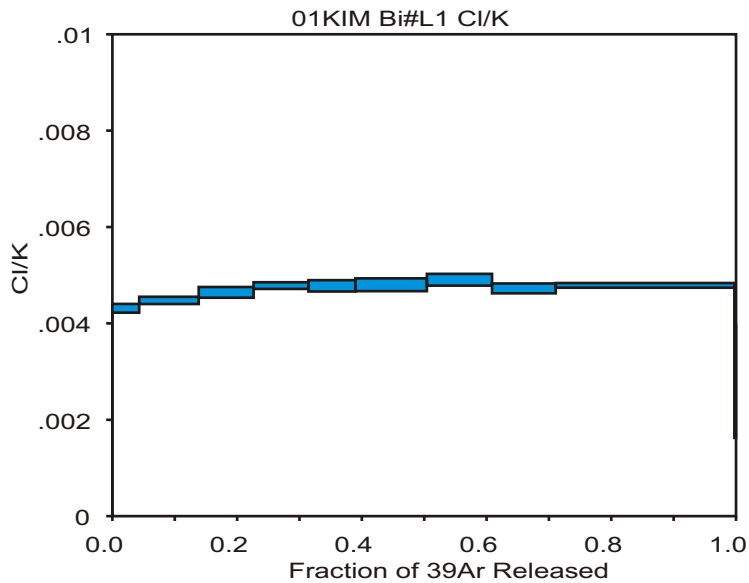

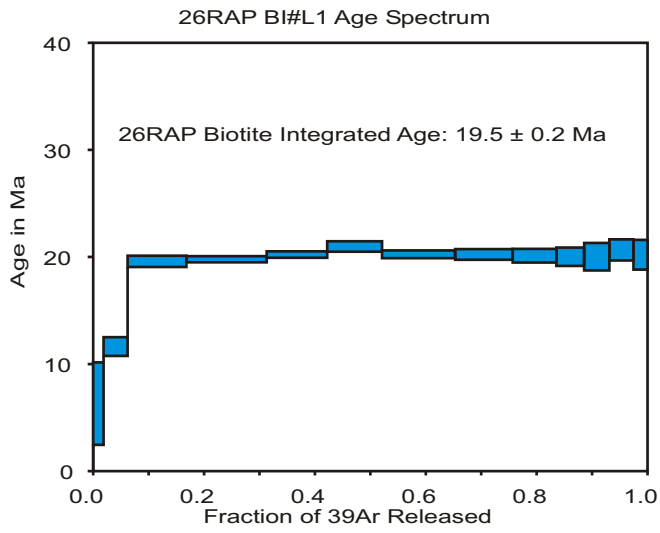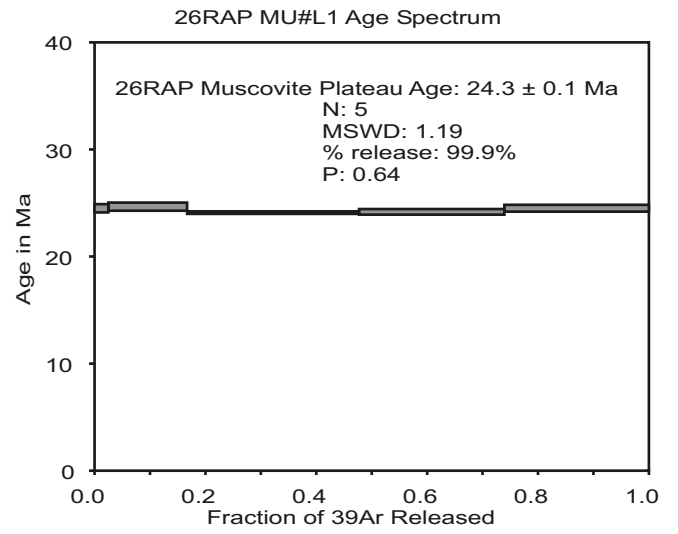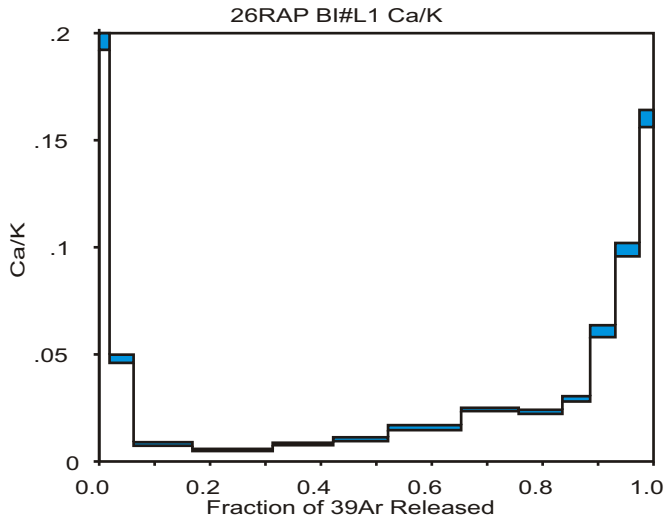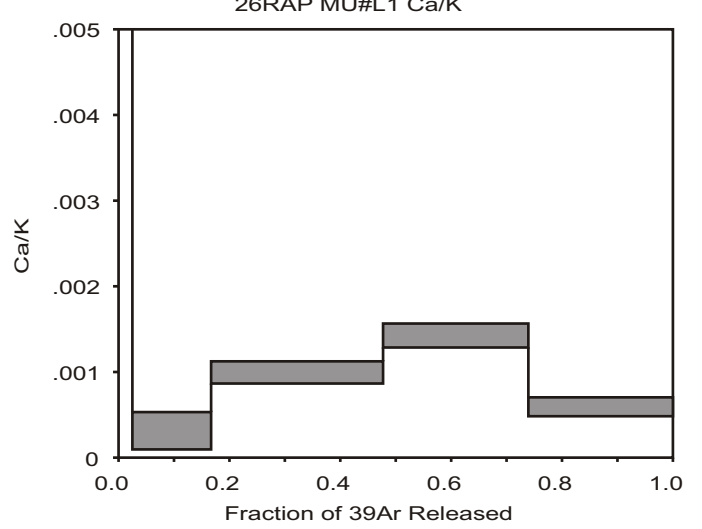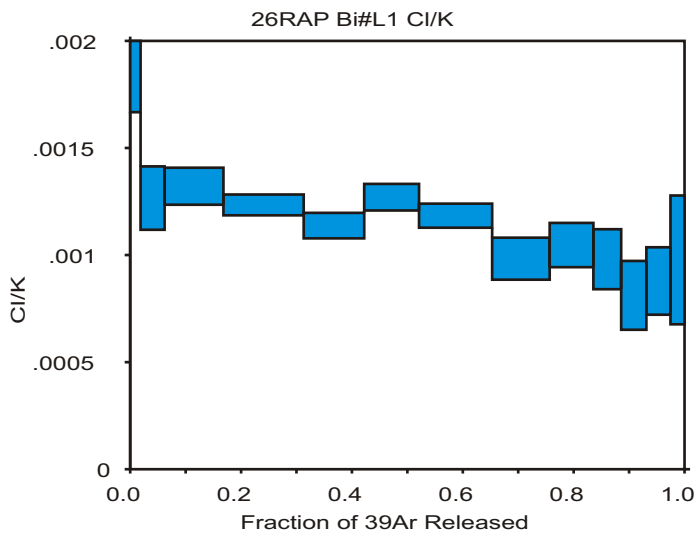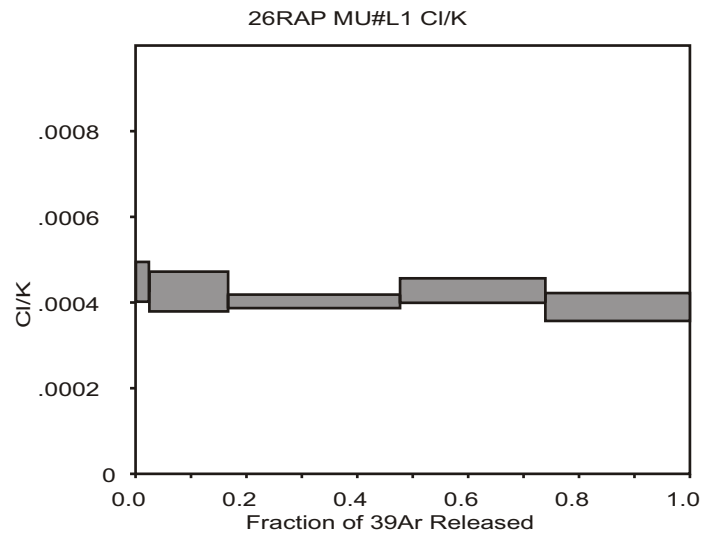

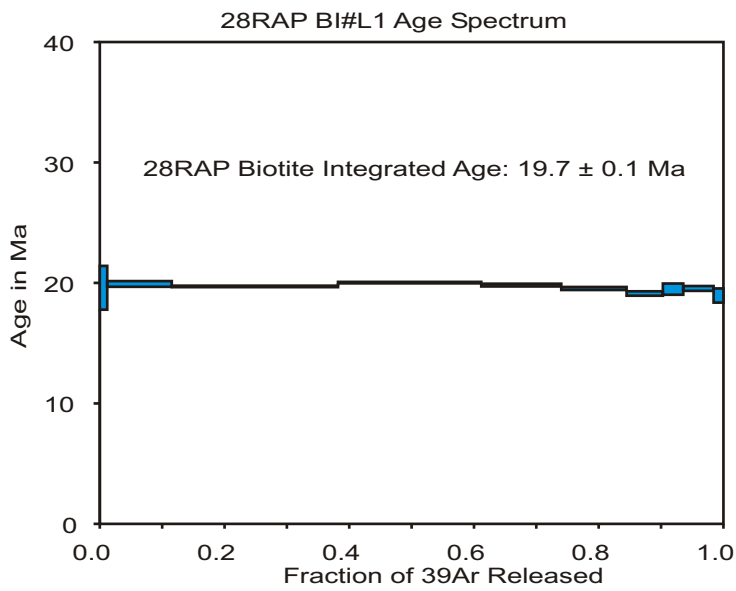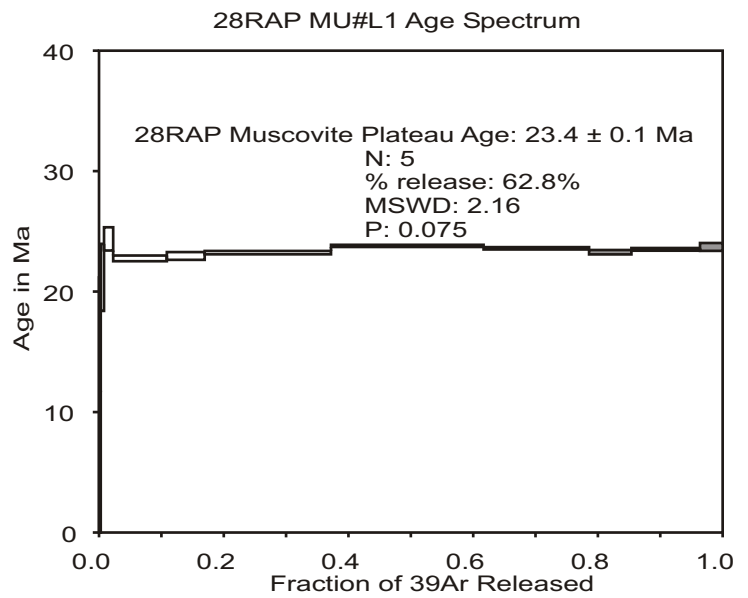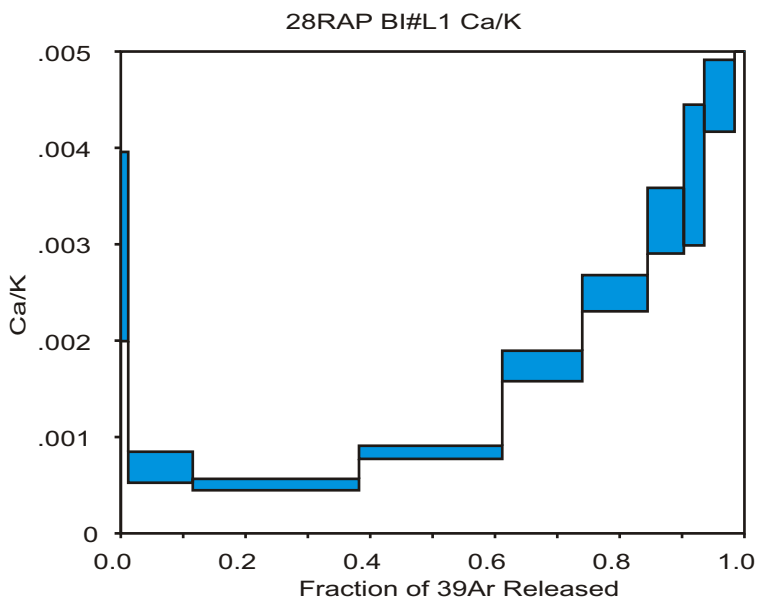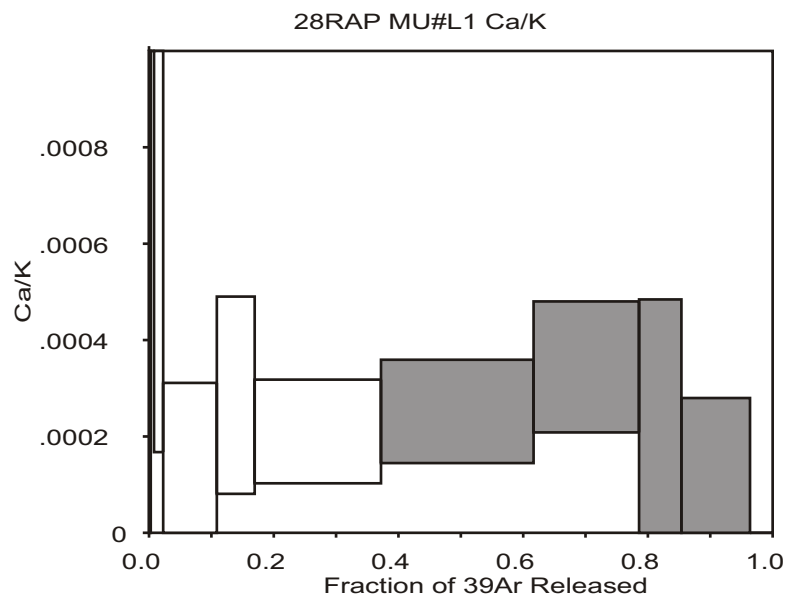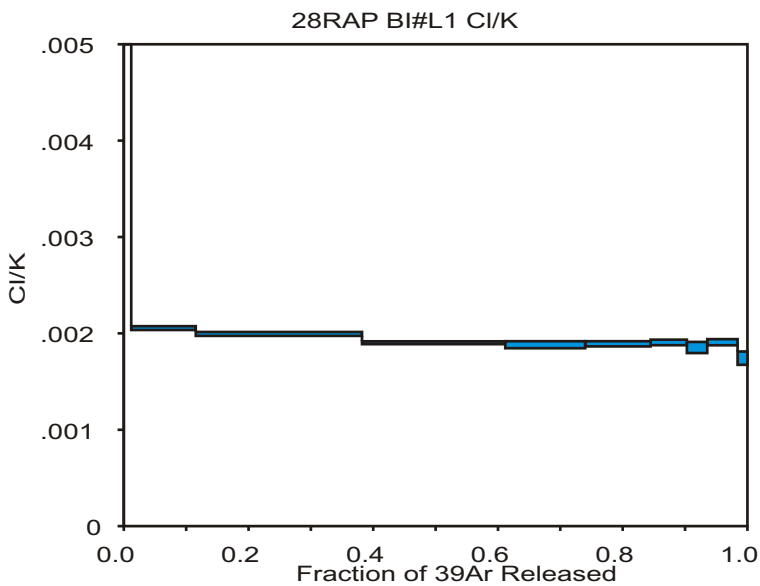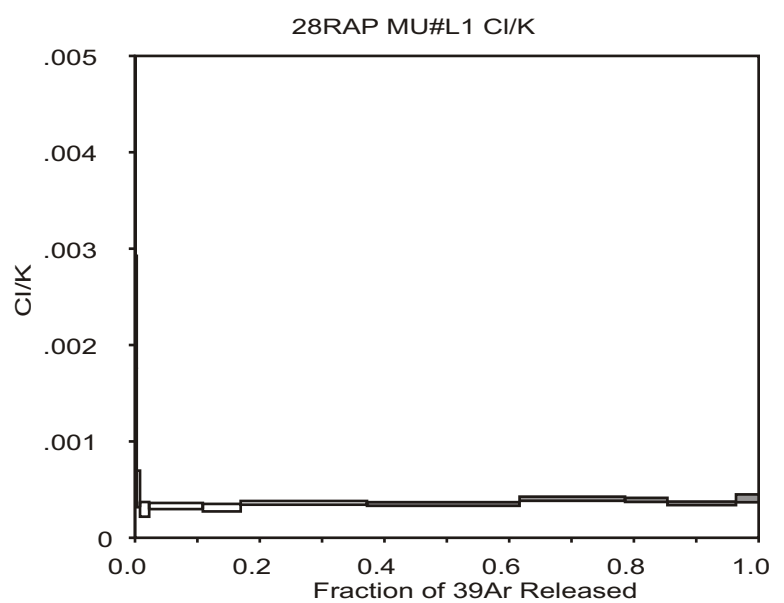

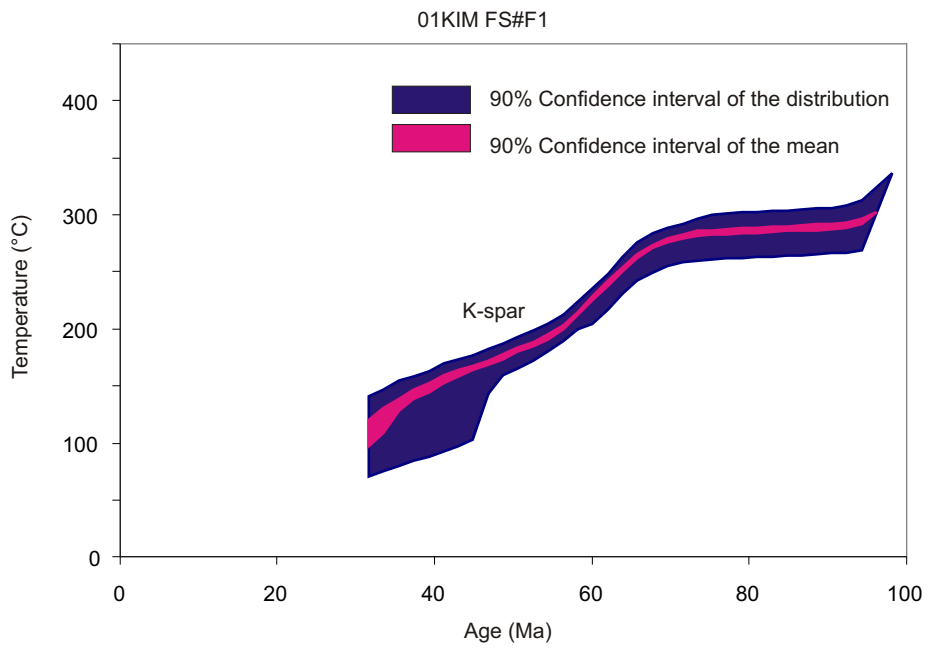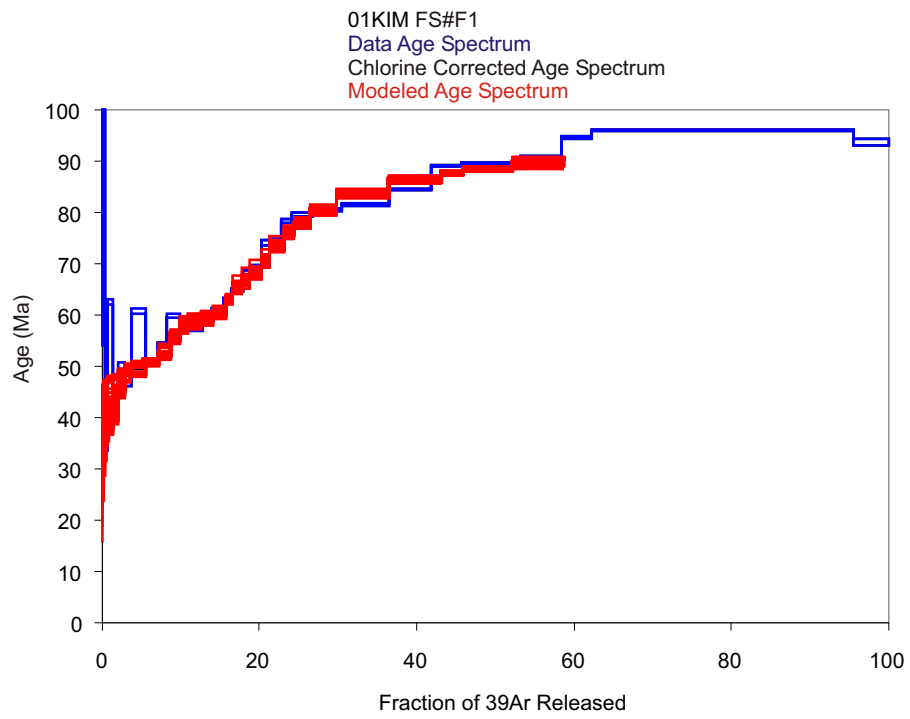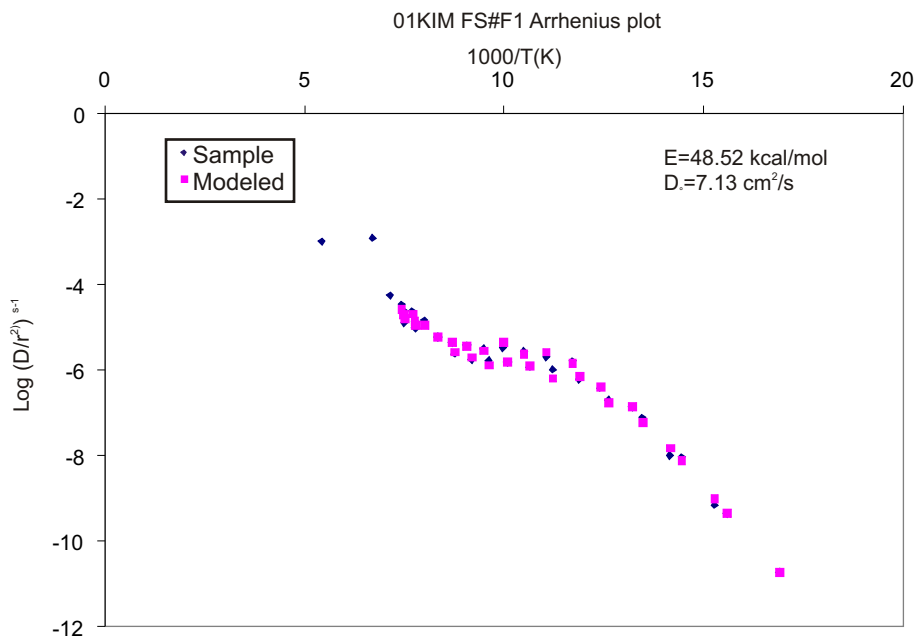

A5

26RAP FS#F1 Cooling History

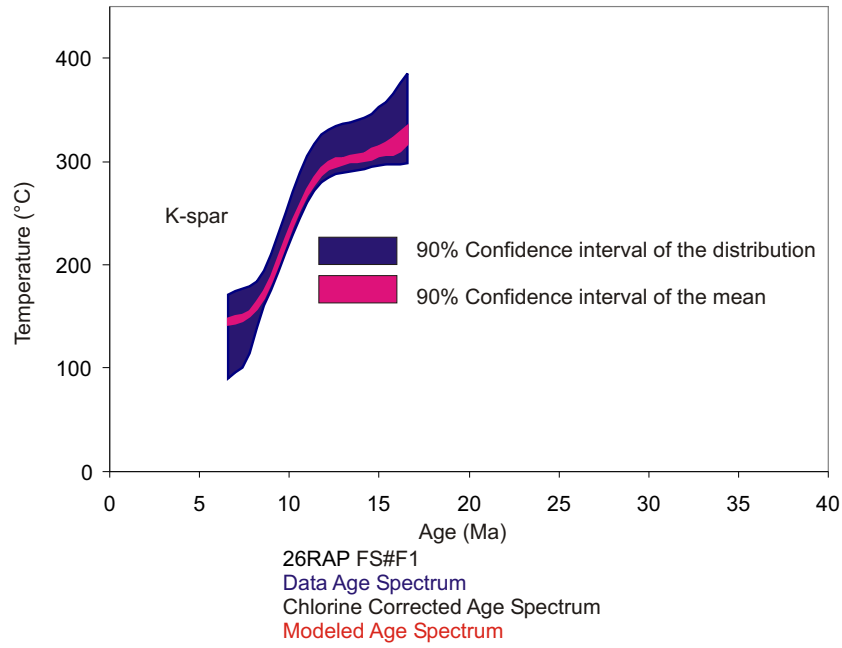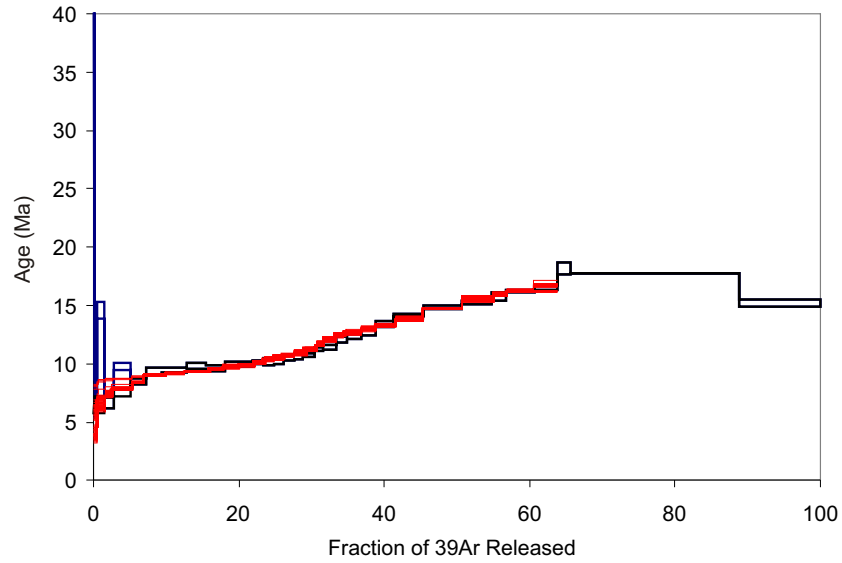

26RAP FS#F1 Arrhenius plot

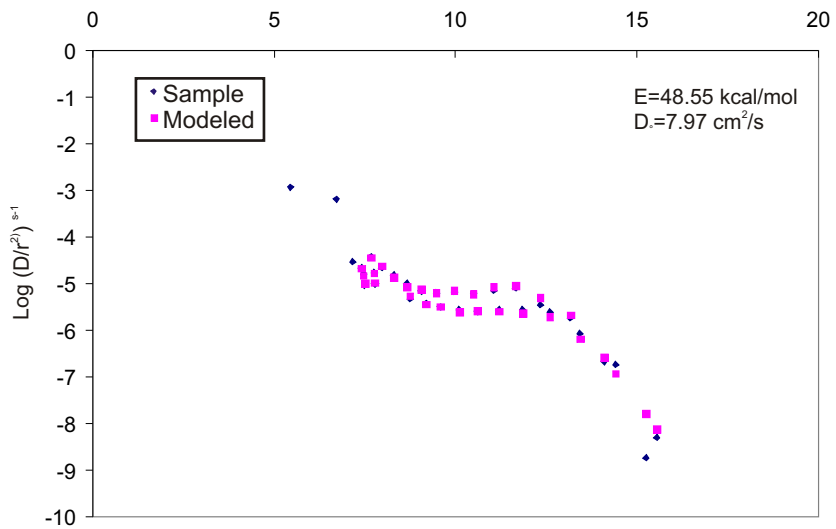

19BAL FS#F1 Cooling History

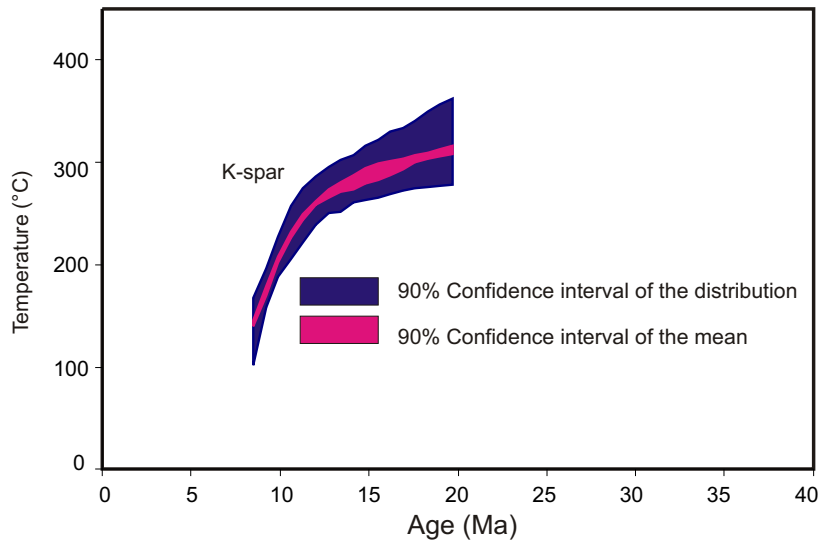

19BAL FS#F1

Data Age Spectrum

Chlorine Corrected Age Spectrum

Modeled Age Spectrum

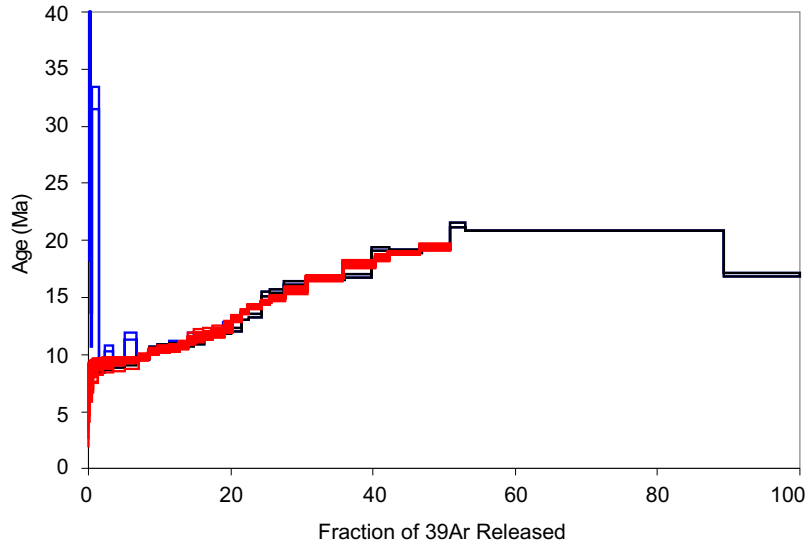

19BAL FS#F1 Arrhenius plot

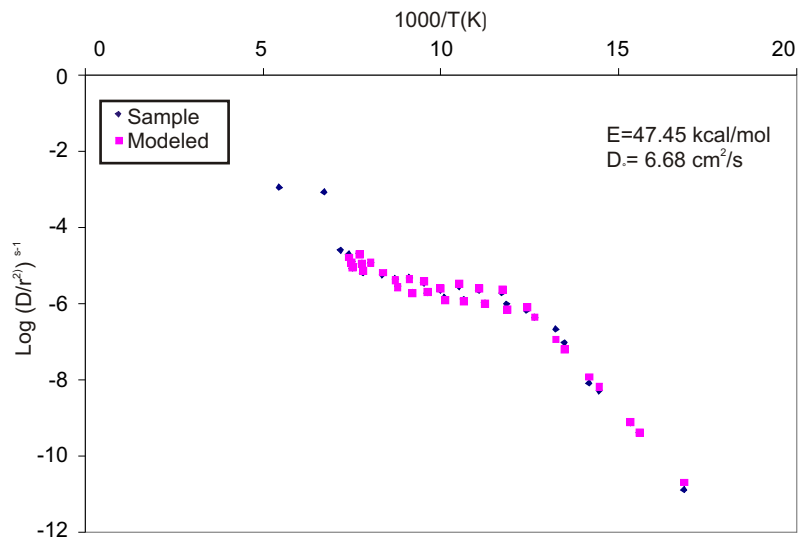

01NEN FS#L1 Age Spectrum

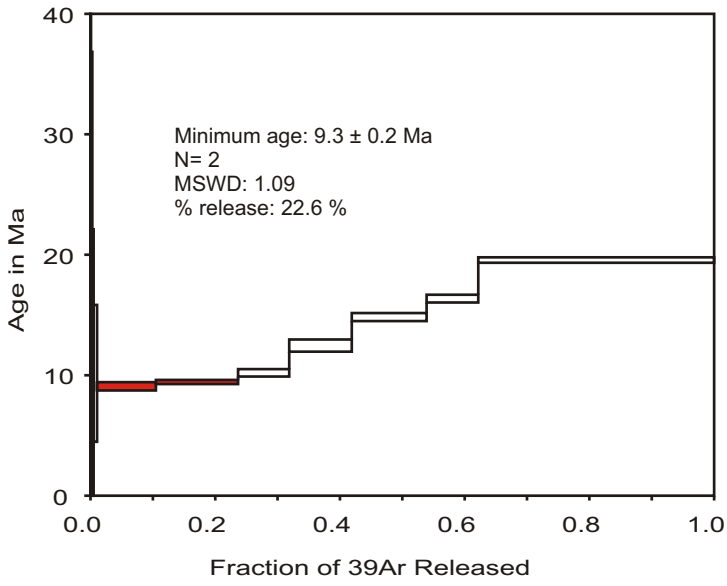

01NEN FS#L1 Isochron

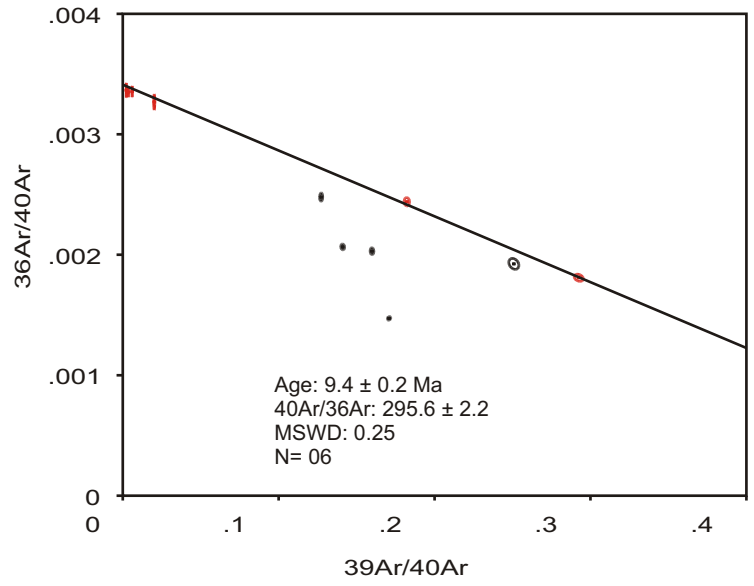

01NEN FS#L1 Ca/K

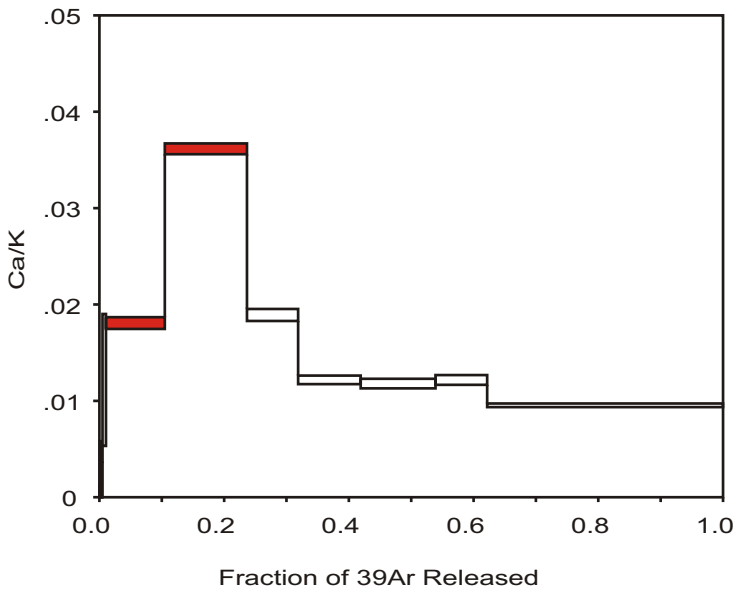

01NEN FS#L1 Cl/K

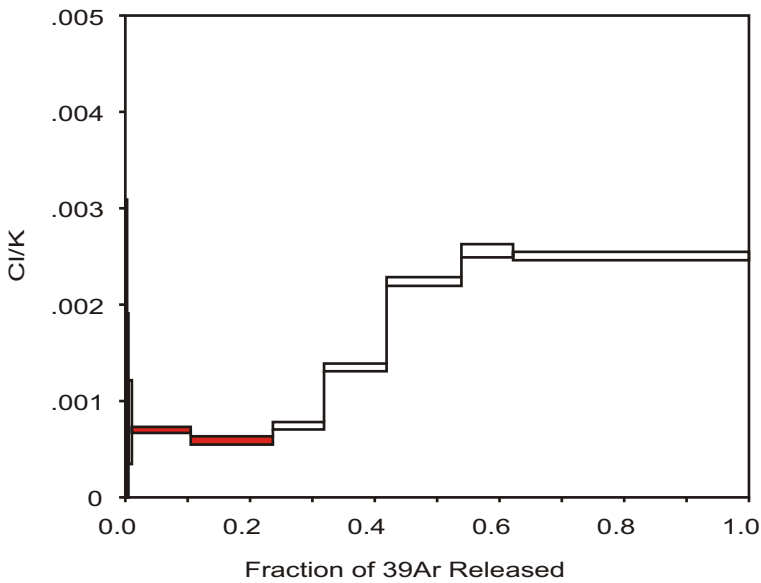

A8



05NEN FS#L1 Age Spectrum

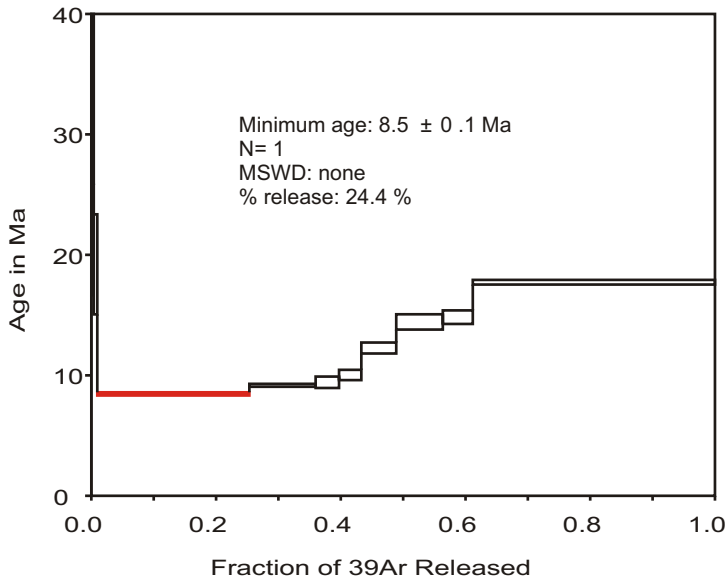

05NEN FS#L1 Isochron

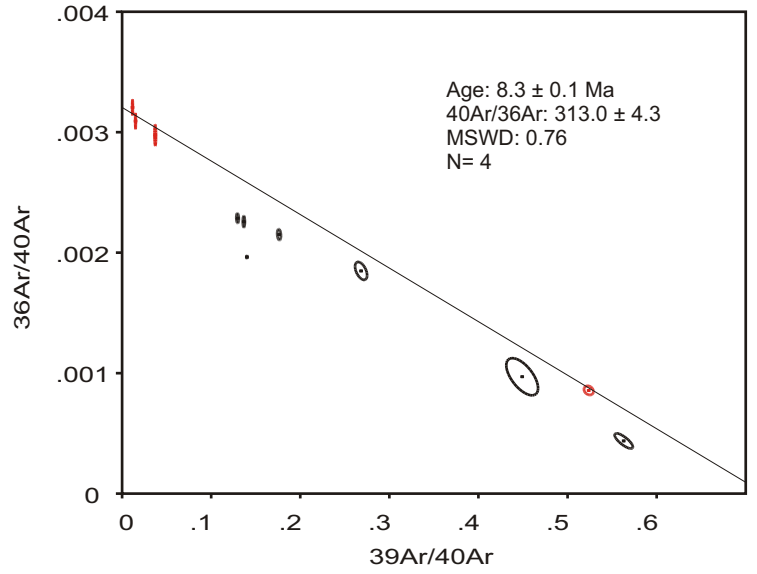

05NEN FS#L1 Ca/K

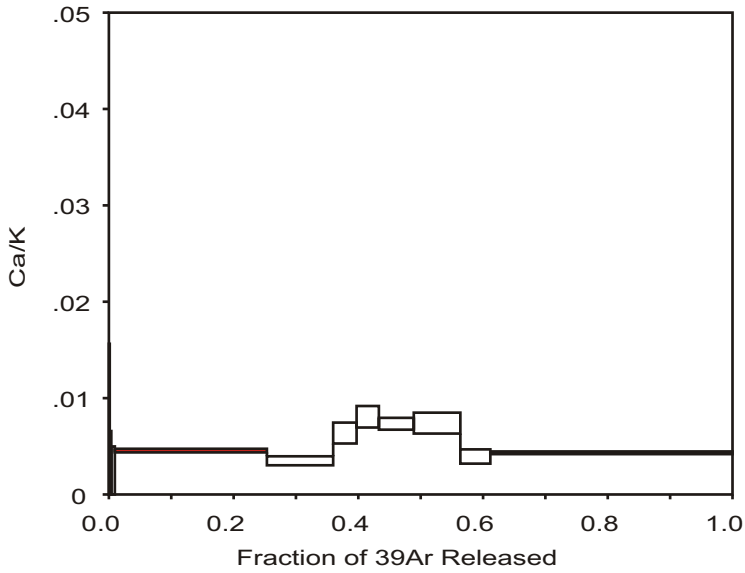

05NEN FS#L1 Cl/K

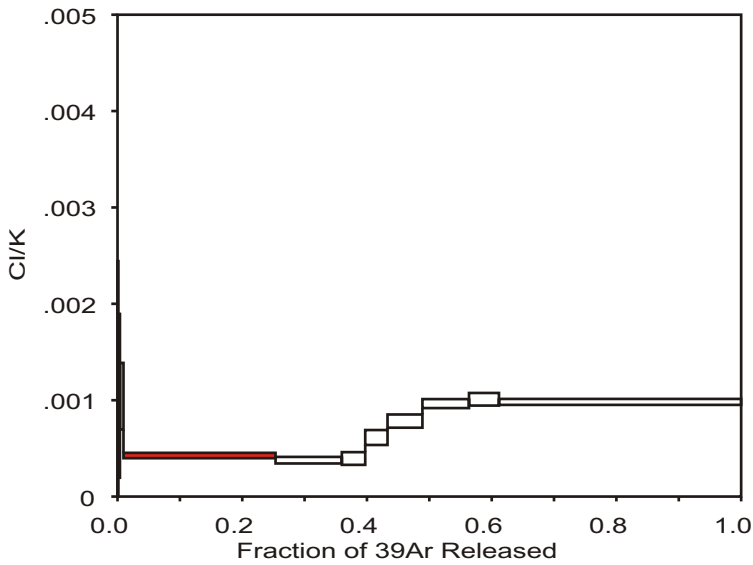

A9

28NEN FS#L1 Age Spectrum

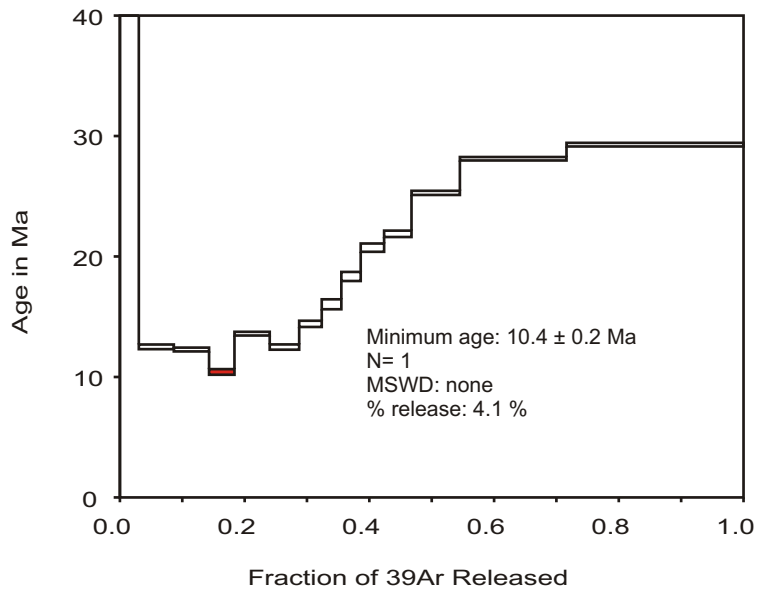

28NEN FS#L1 Ca/K

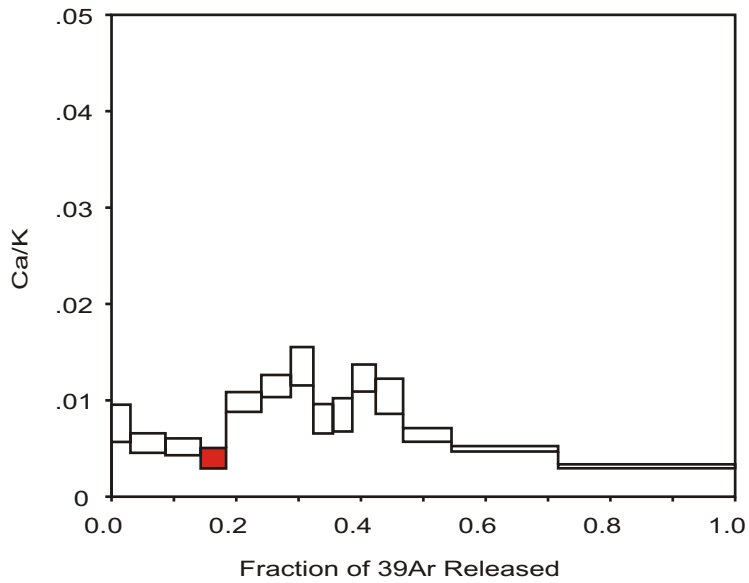

28NEN FS#L1 Cl/K

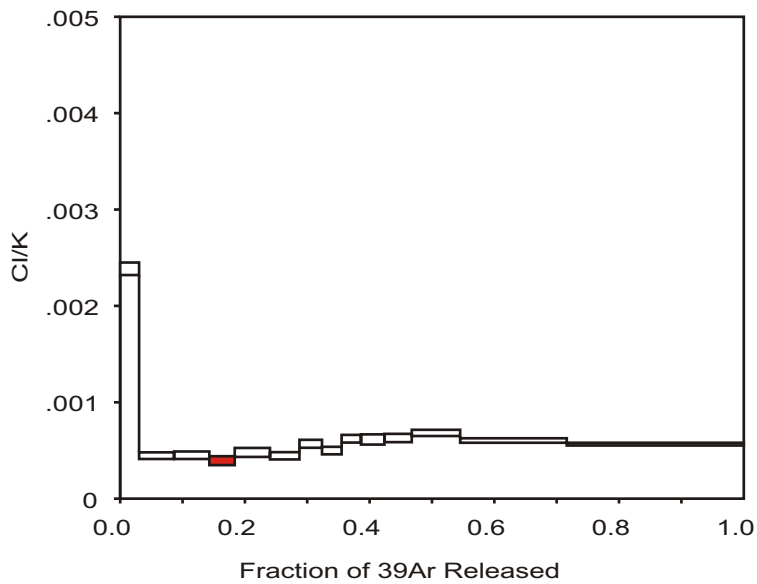

**A10**

29NEN FS#L1 Age Spectrum

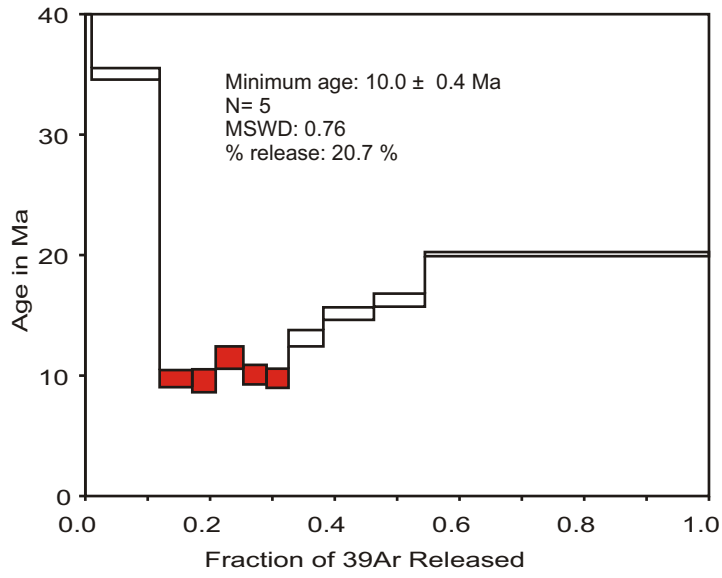

29NEN FS#L1 Ca/K

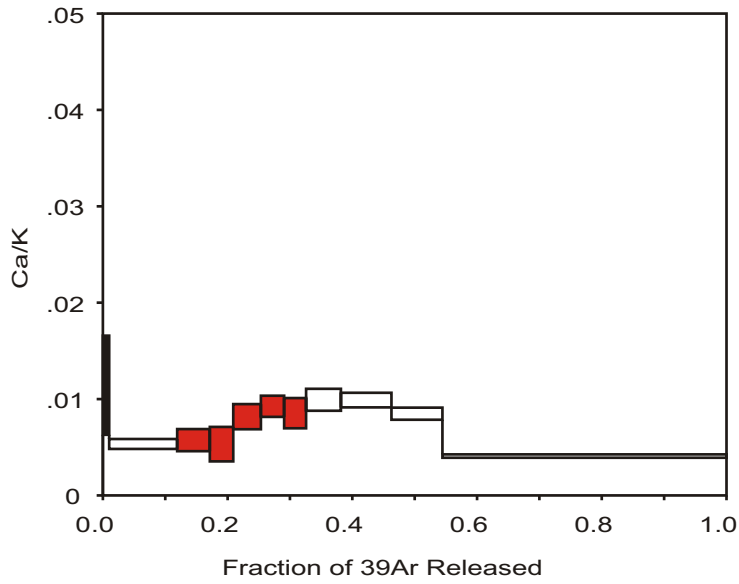

29NEN FS#L1 Cl/K

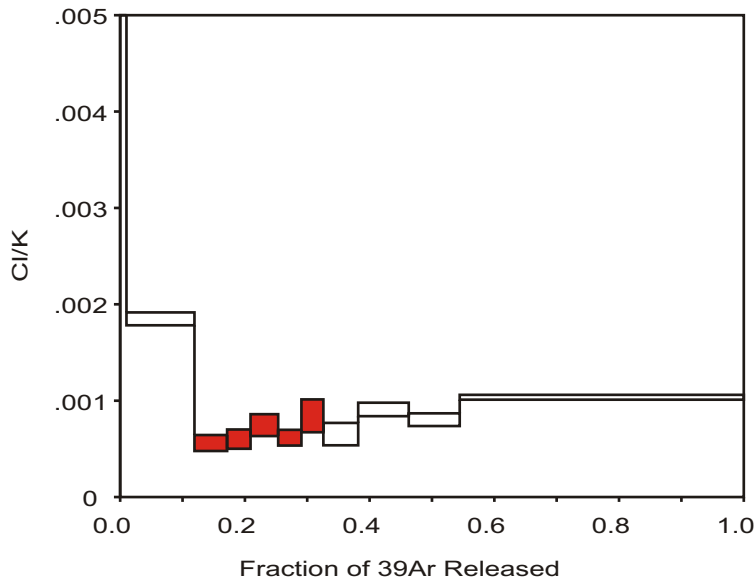

A11

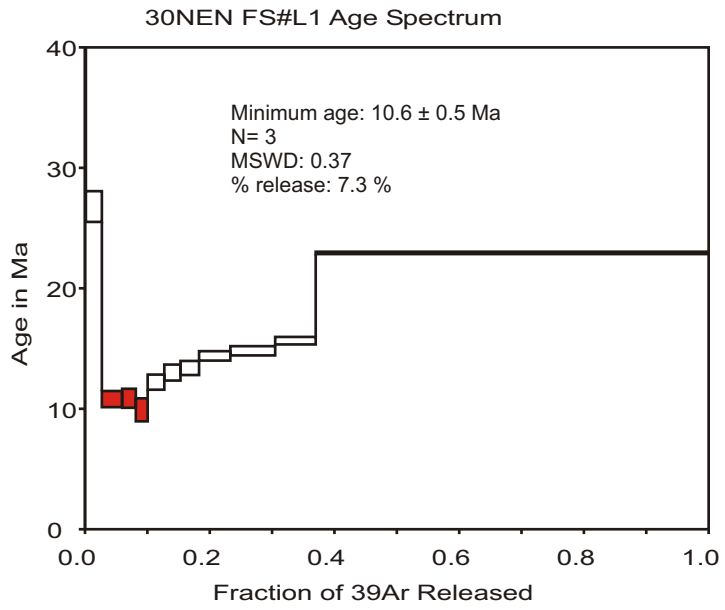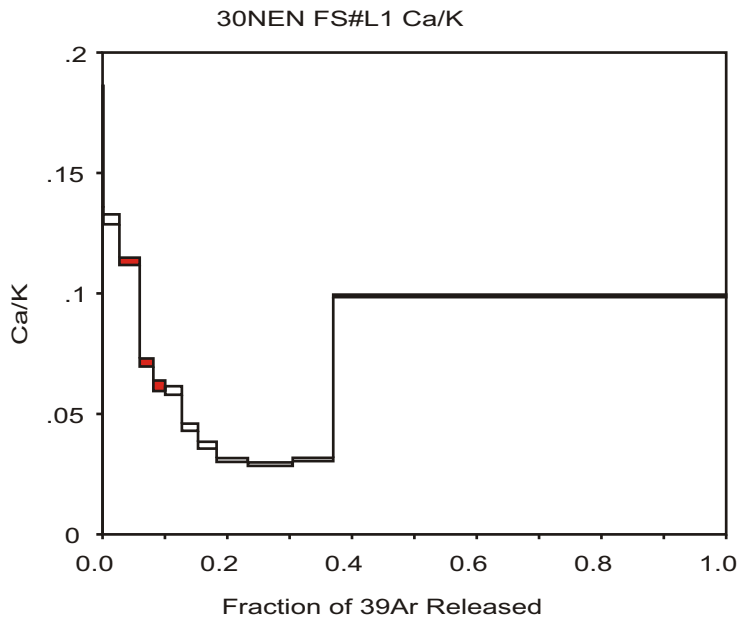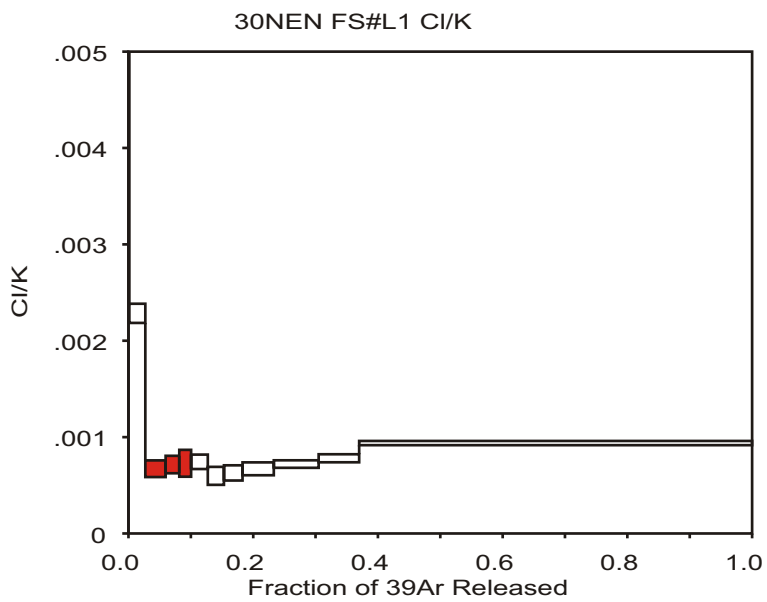

**A12**

41NEN FS#L1 Age Spectrum

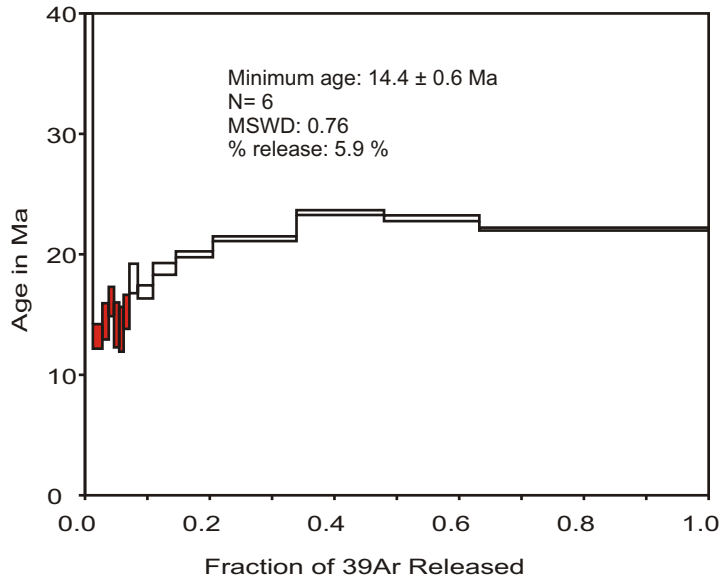

41NEN FS#L1 Ca/K

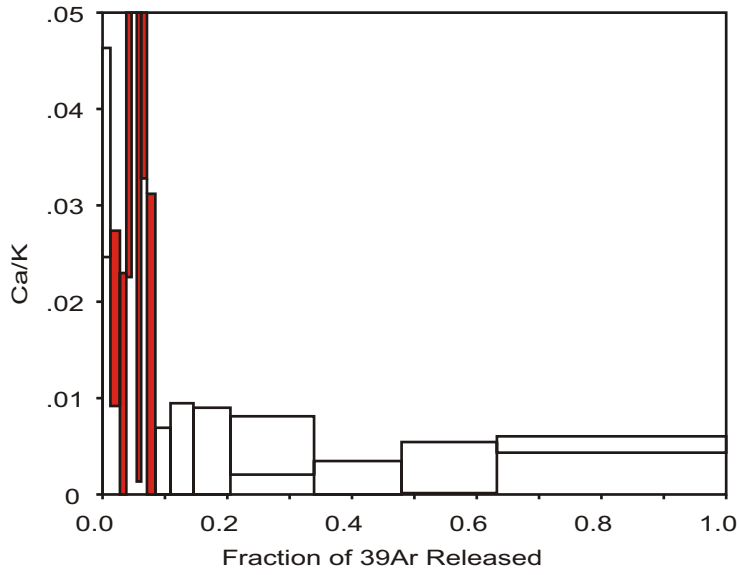

41NEN FS#L1 Cl/K

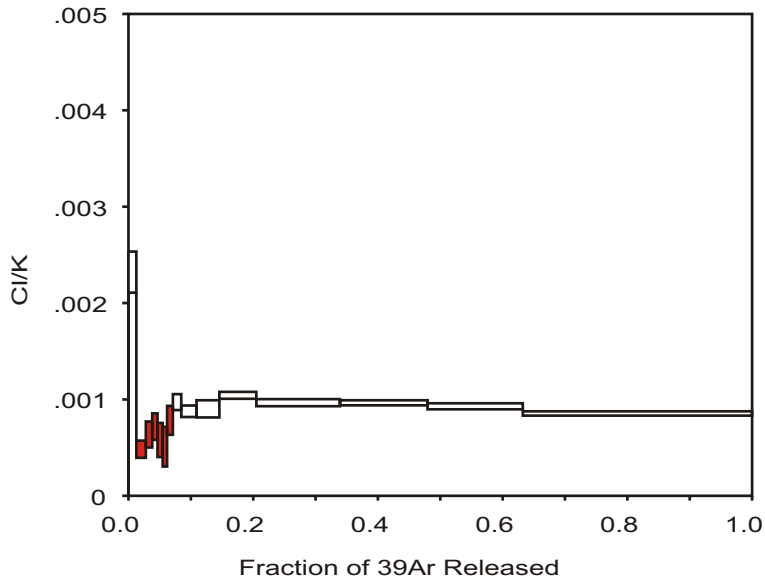

A13

42NEN FS#L1 Age Spectrum

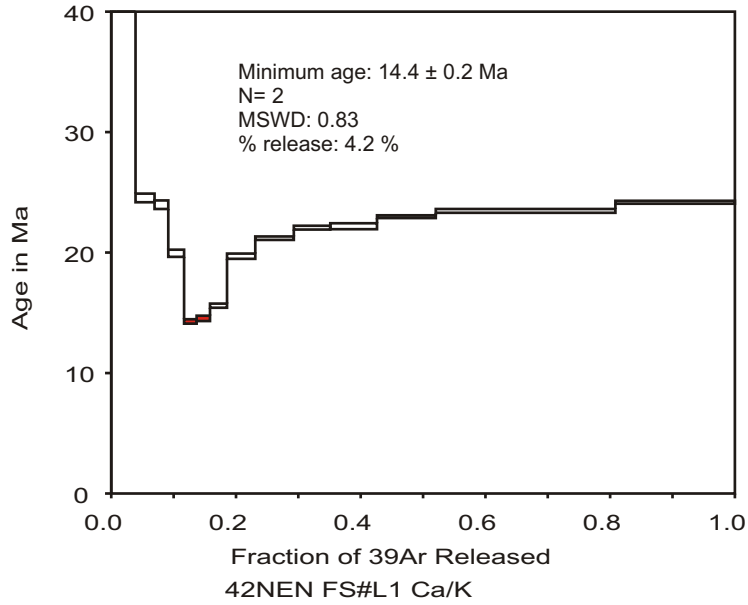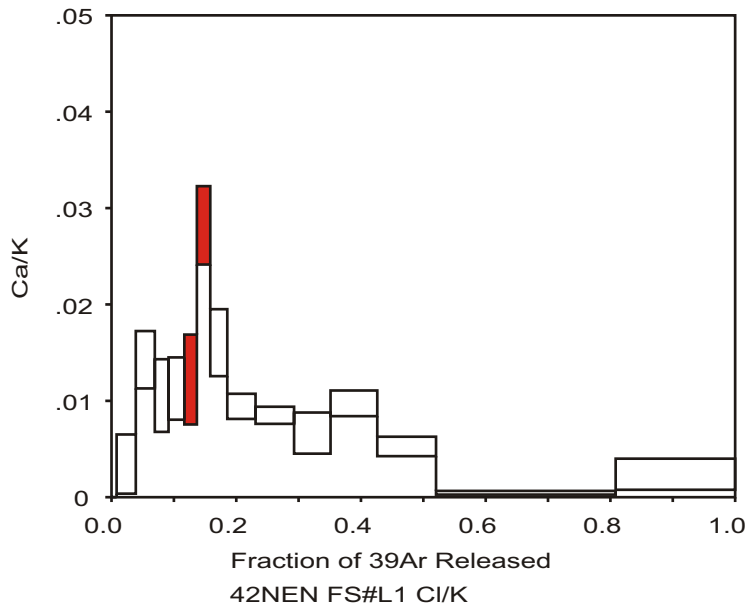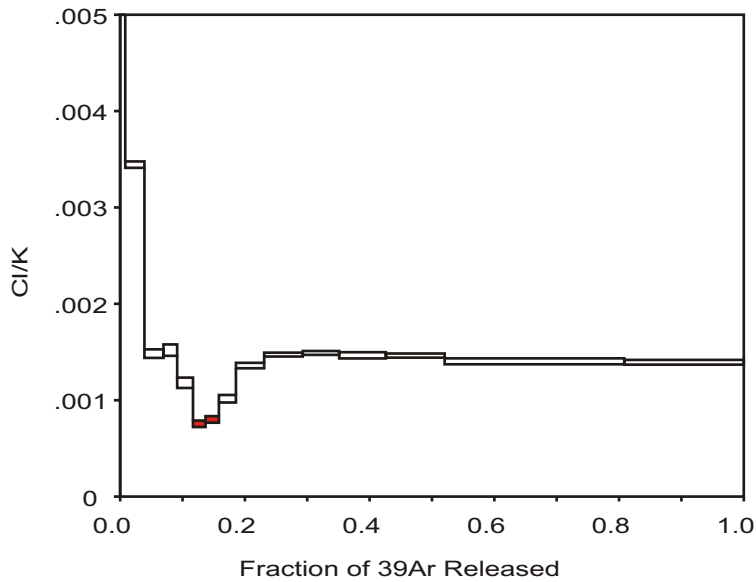

**A14**

45NEN FS#F1

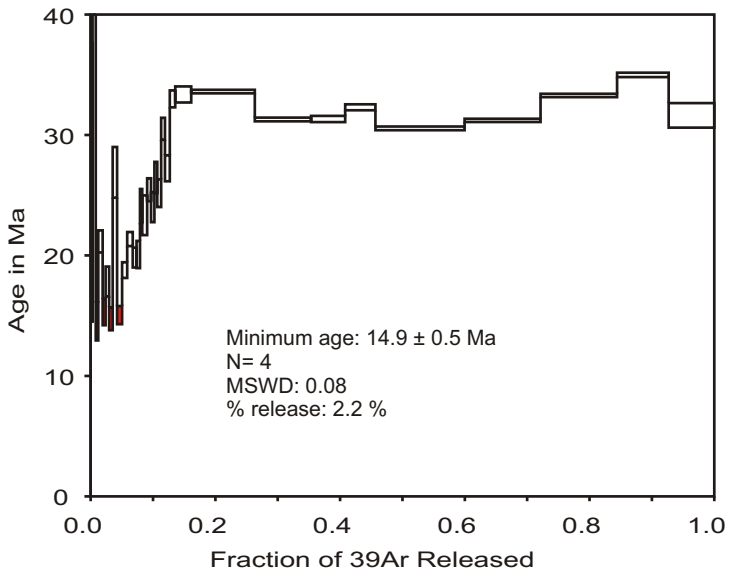

45NEN FS#F1 Isochron

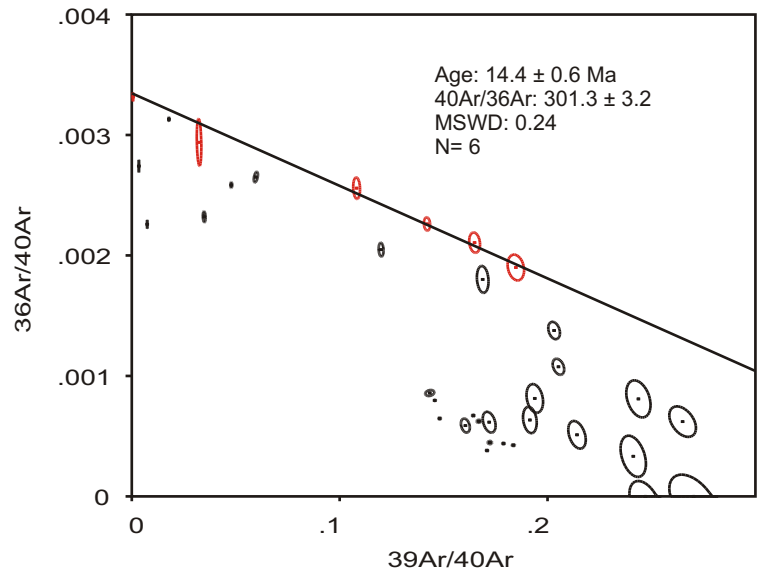

45NEN FS#F1 Ca/K

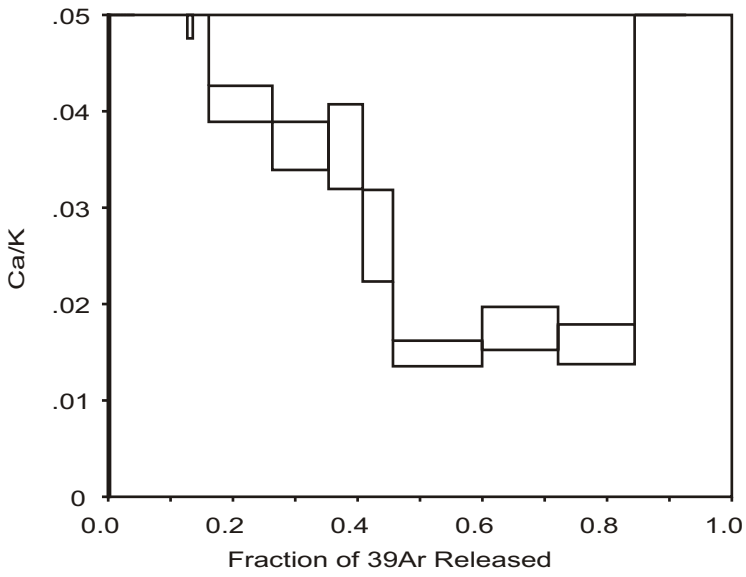

45NEN FS#F1 Cl/K

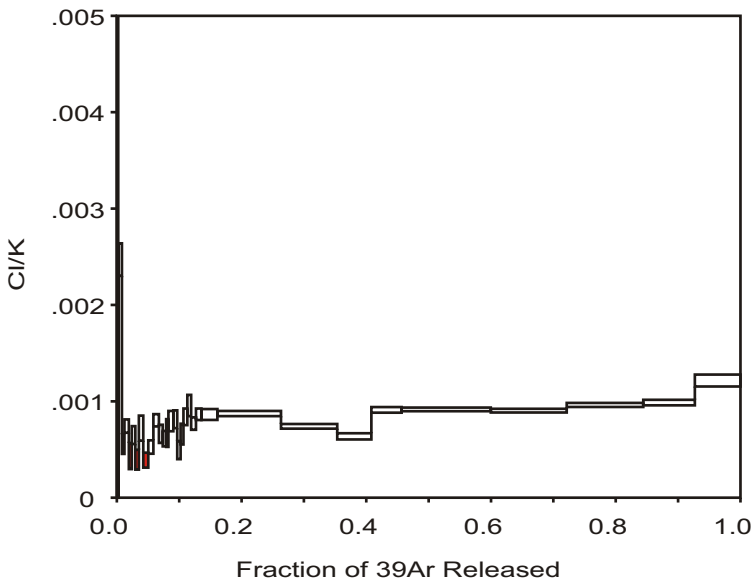

A15

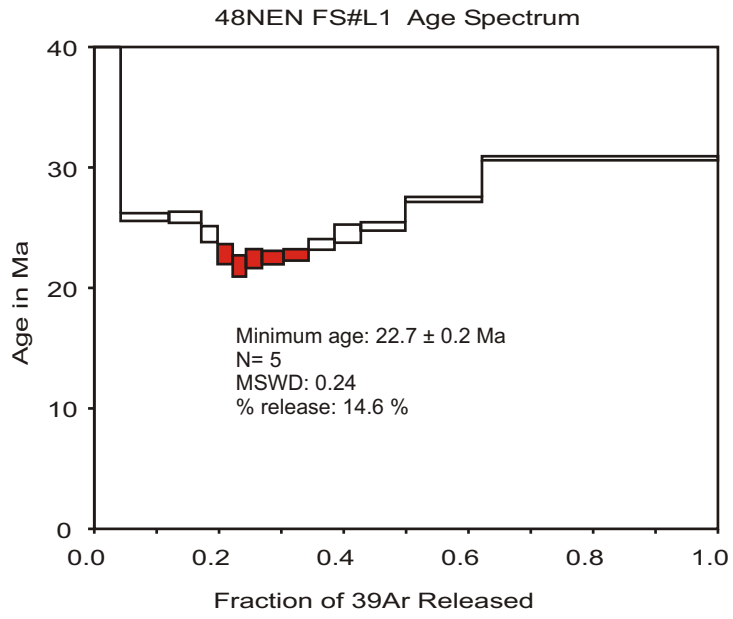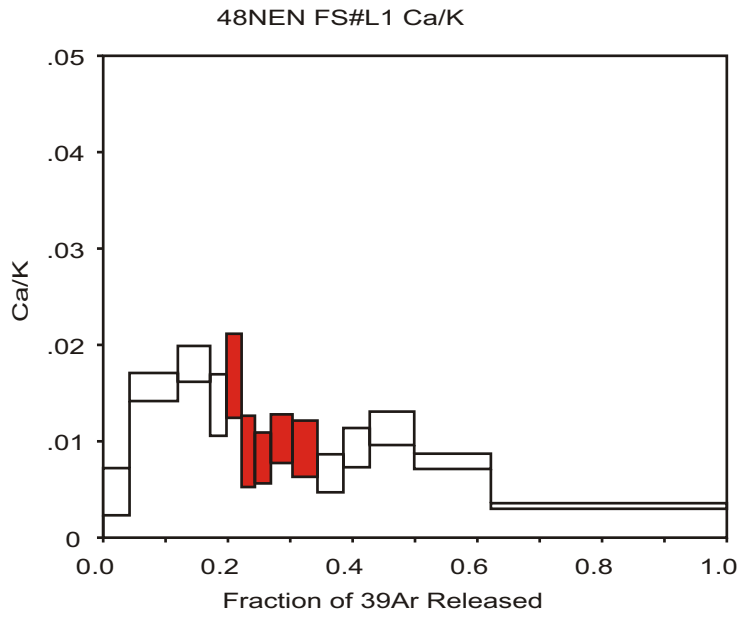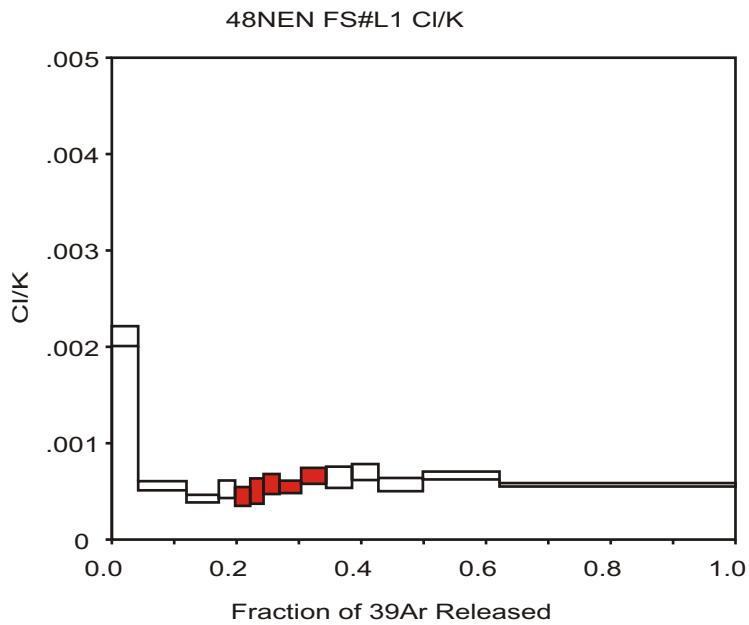

**A16**



60NEN FS#L1 Age Spectrum

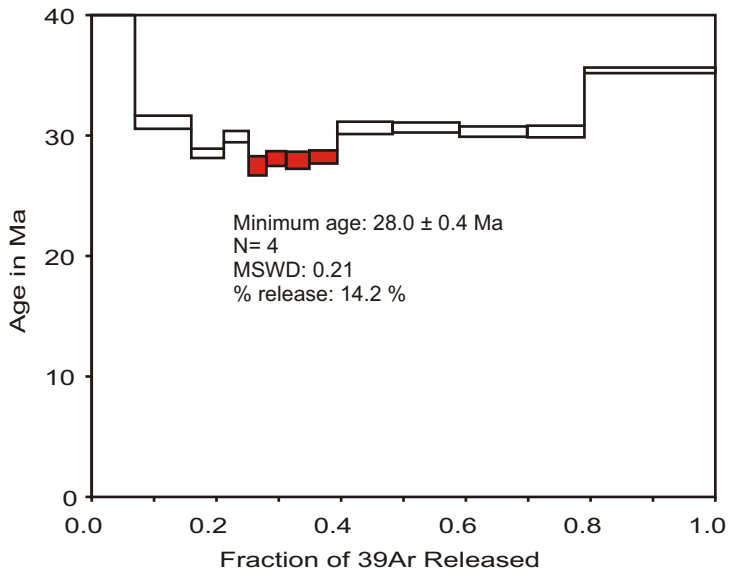

60NEN FS#L1 Isochron

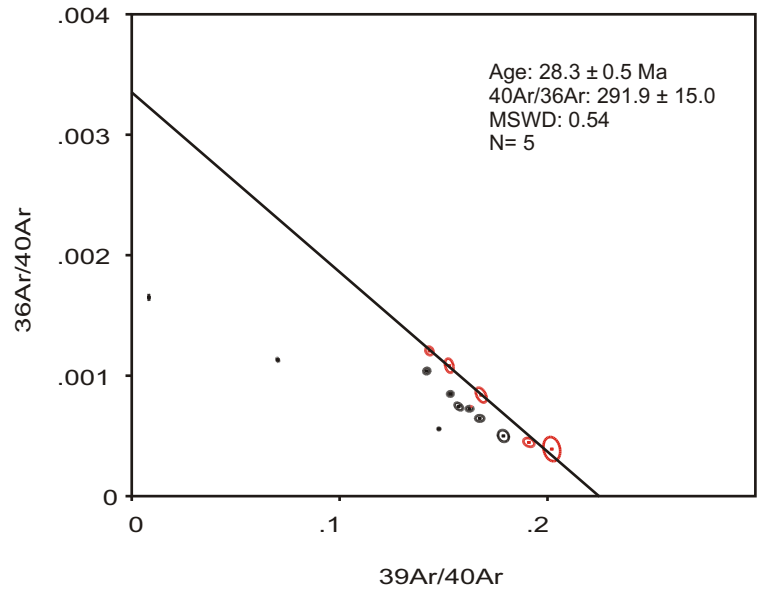

60NEN FS#L1 Ca/K

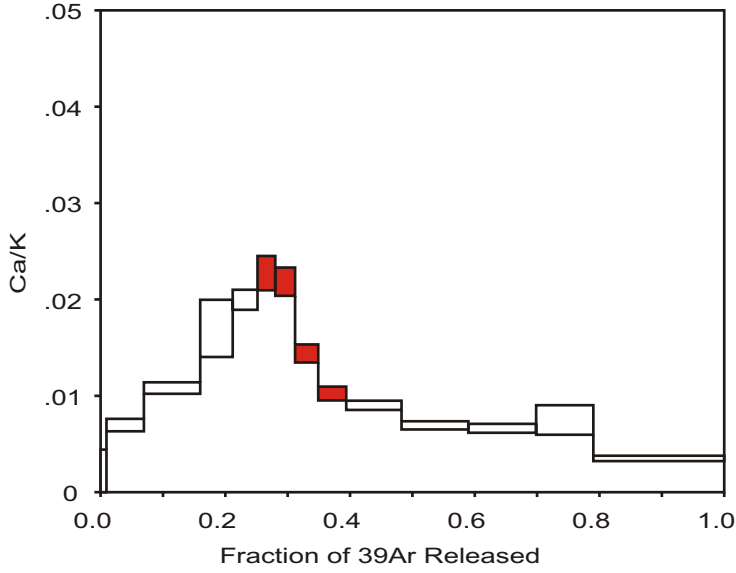

60NEN FS#L1 Cl/K

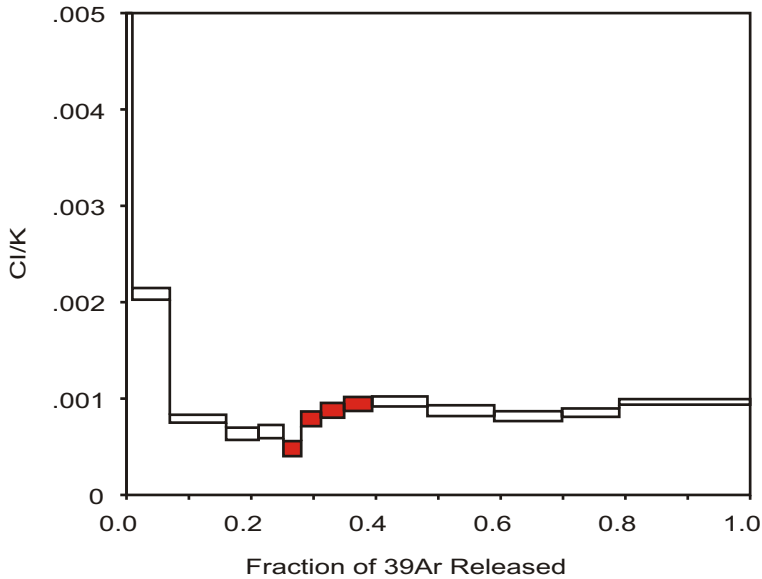

**A17**

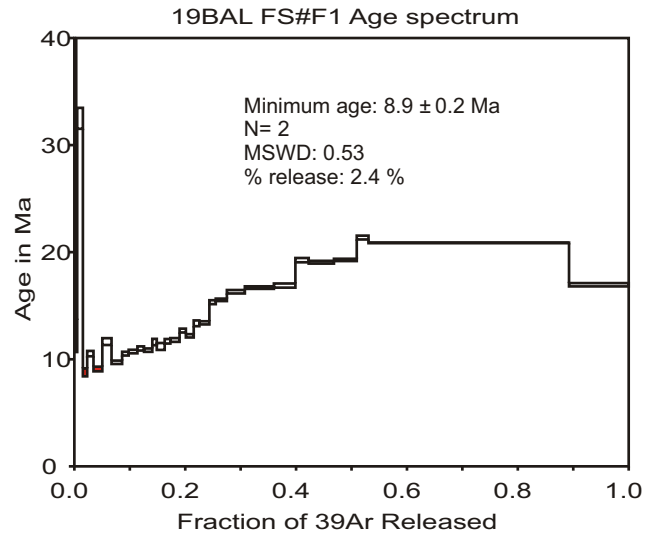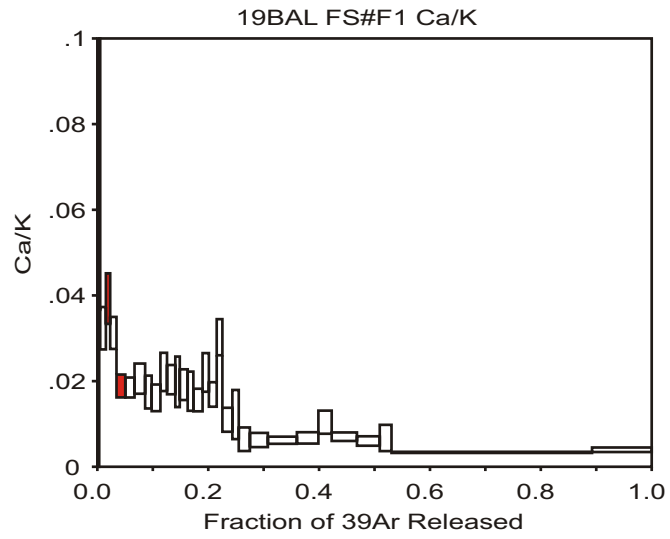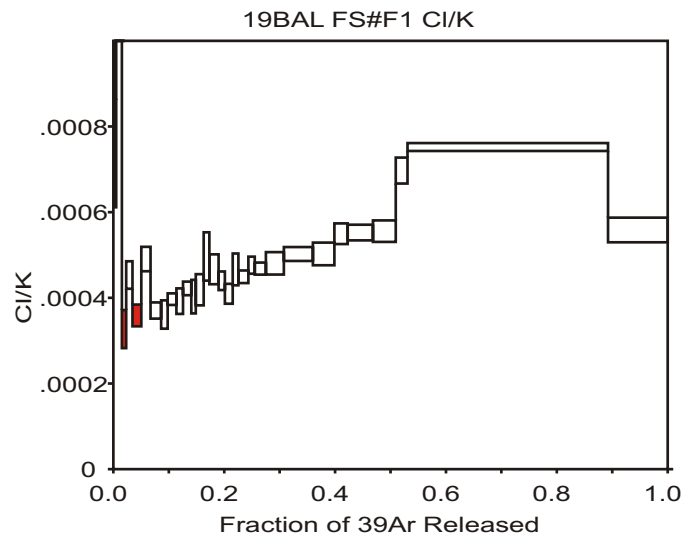

**A18**

21BAL FS#L1 Age Spectrum

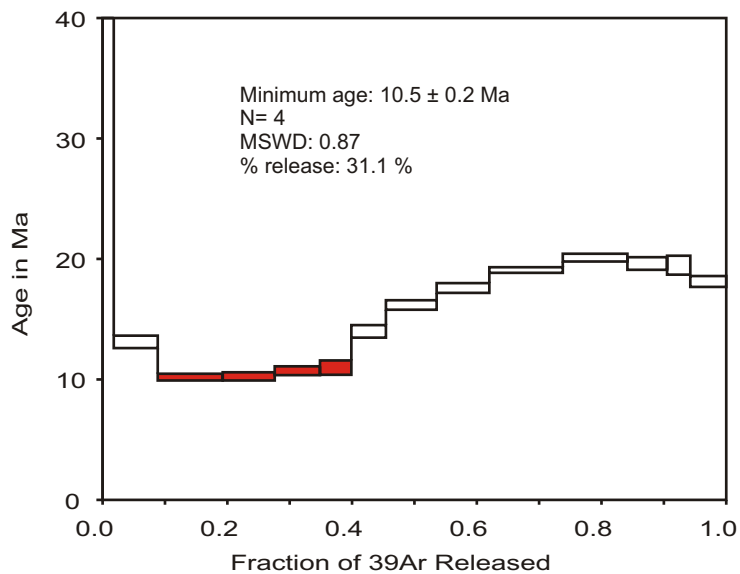

21BAL FS#L1 Ca/K

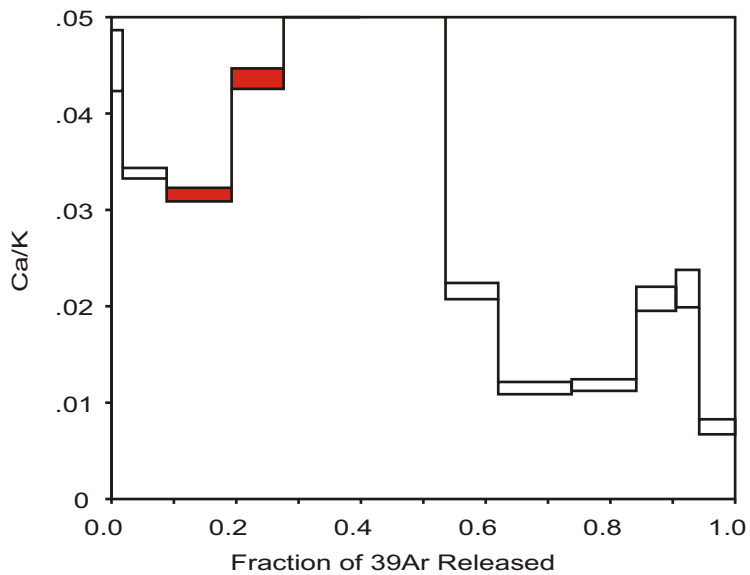

21BAL FS#L1 Cl/K

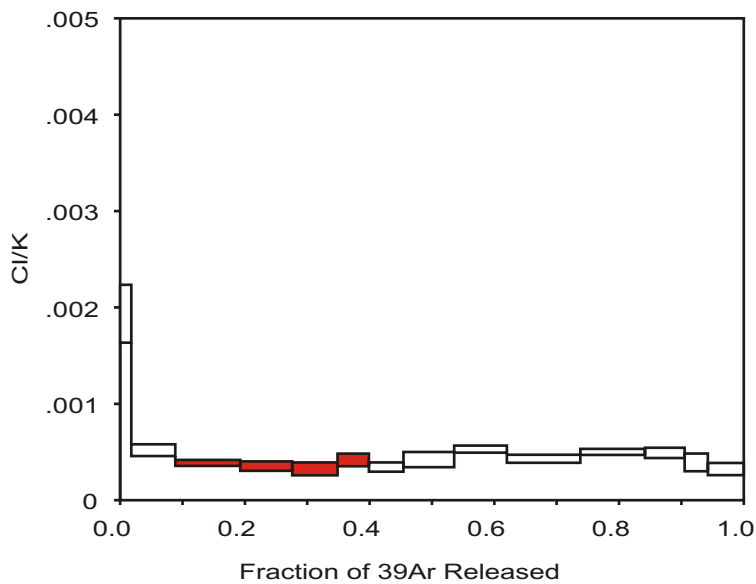

A19

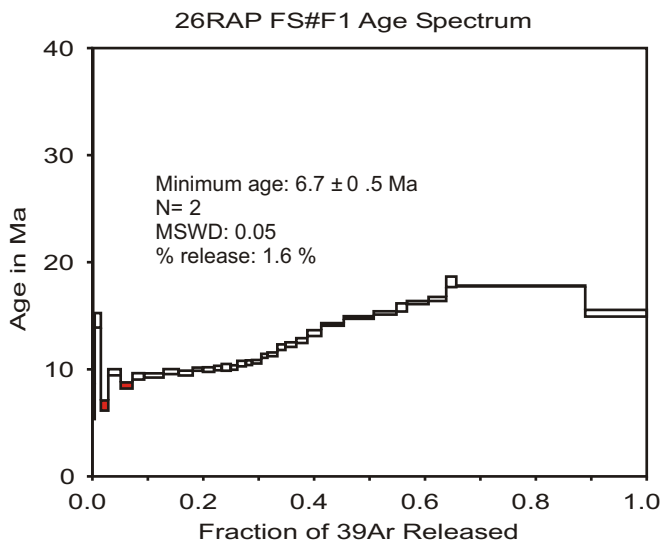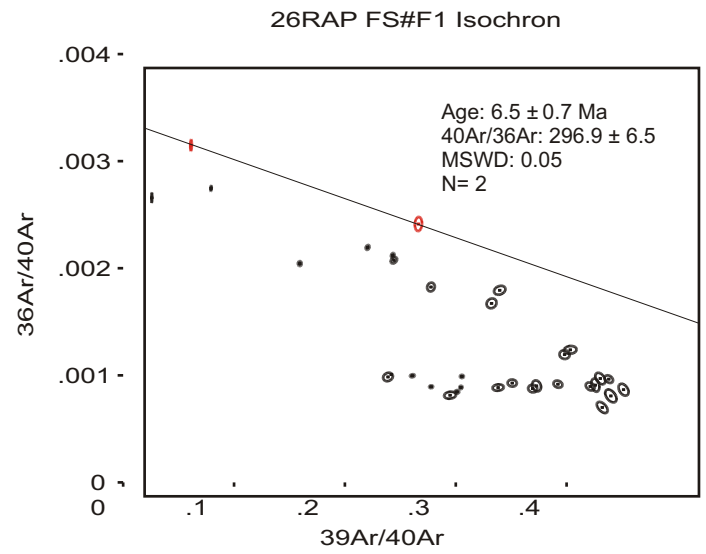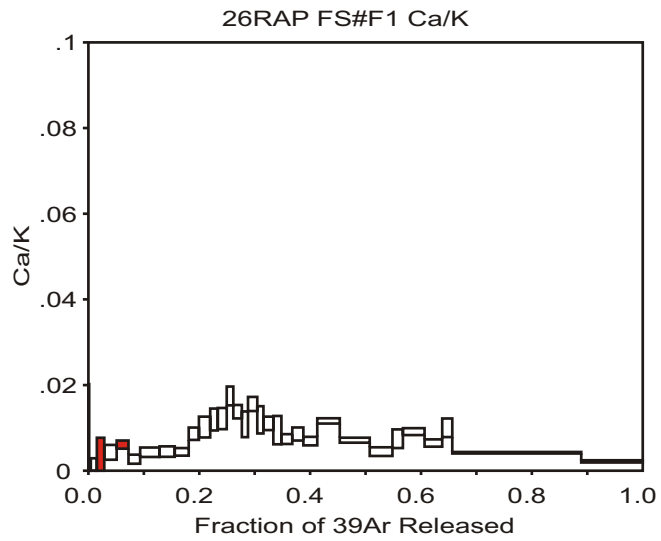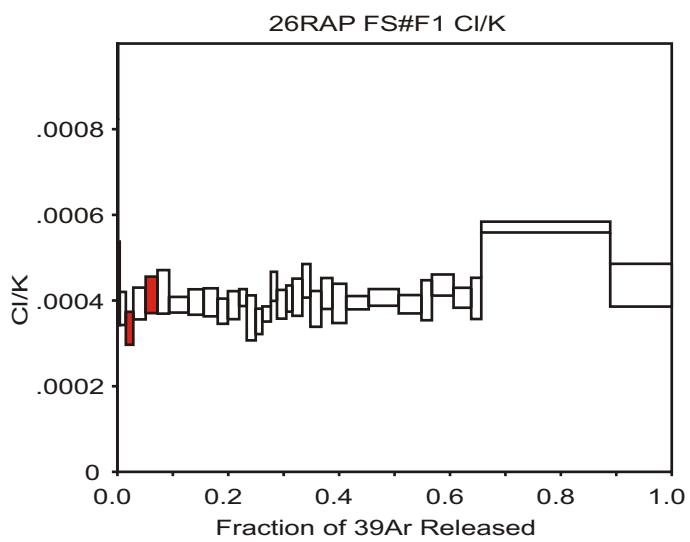

**A20**

27RAP FS#L1 Age Spectrum

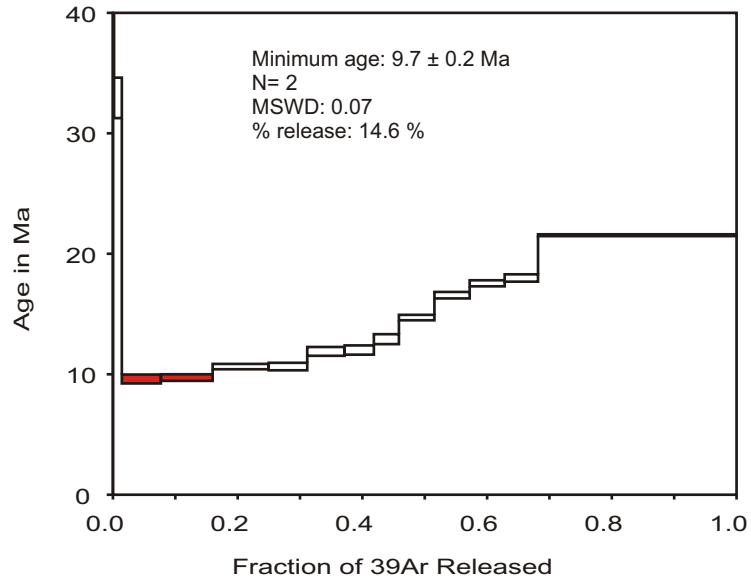

27RAP FS#L1 Ca/K

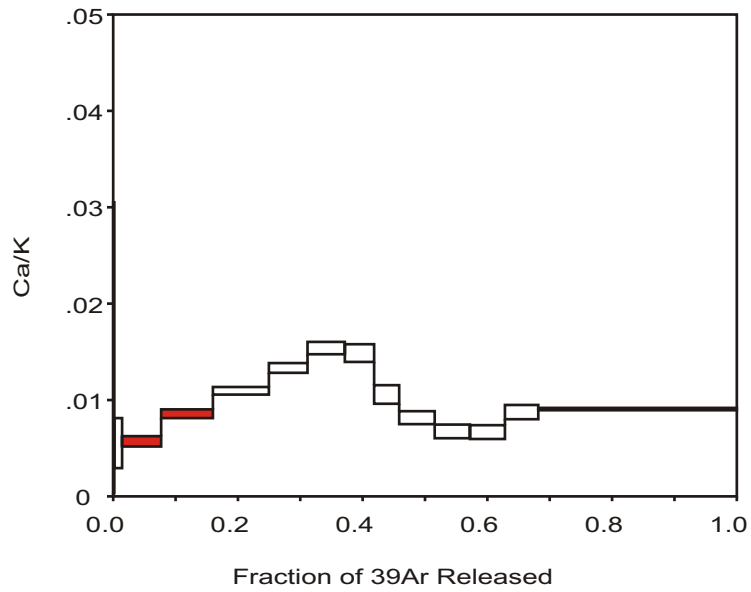

27RAP FS#L1 Cl/K

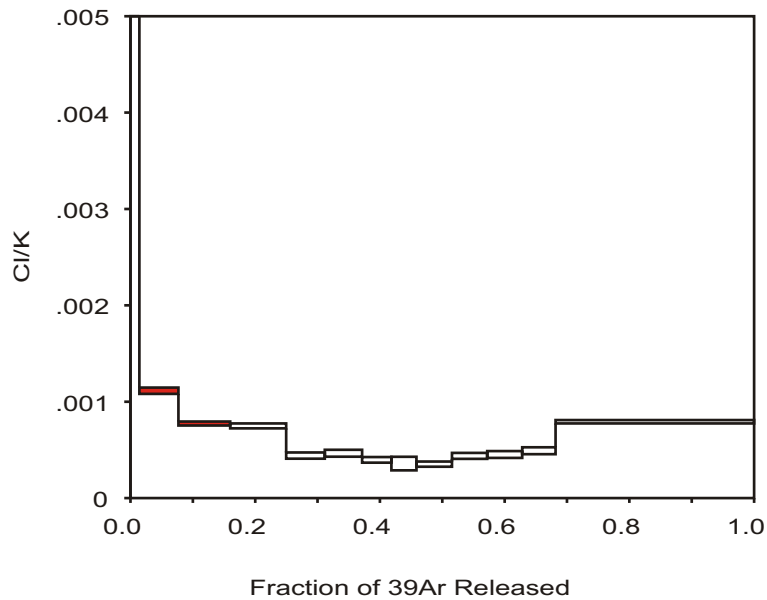

A21

30RAP FS#L1 Age Spectrum

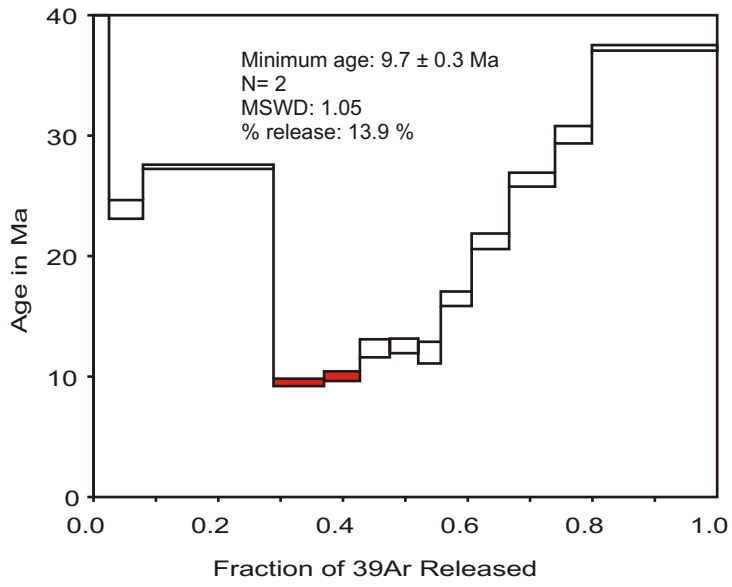

30RAP FS#L1 Ca/K

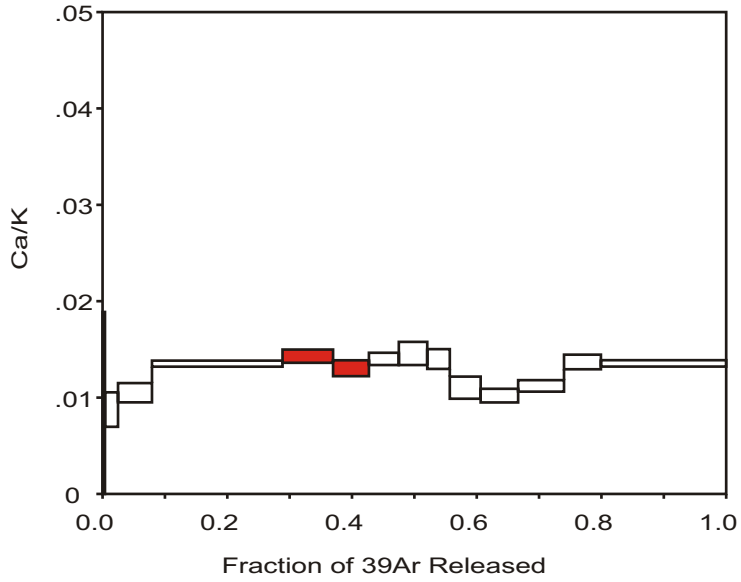

30RAP FS#L1 Cl/K

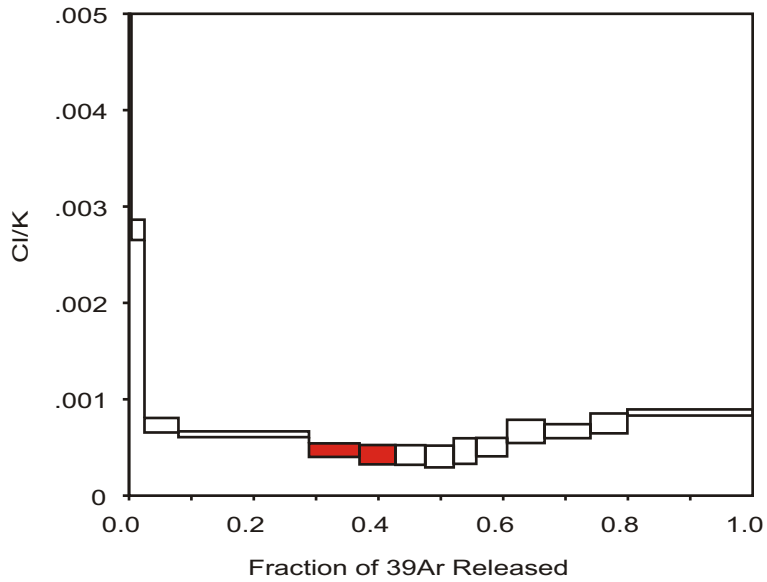

A22

31RAP FS#L1 Age Spectrum

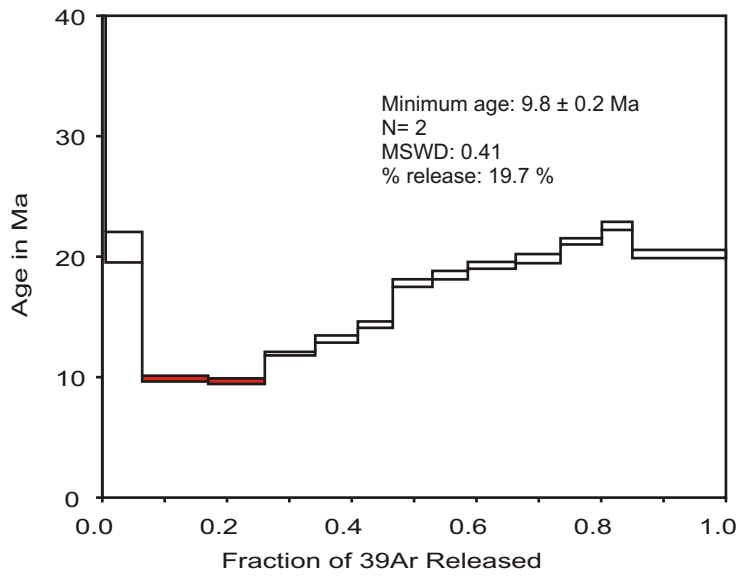

31RAP FS#L1 Ca/K

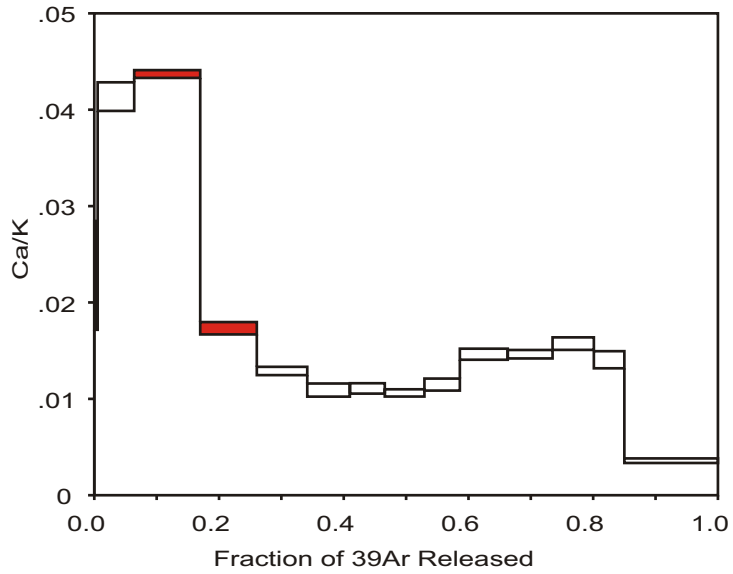

31RAP FS#L1 Cl/K

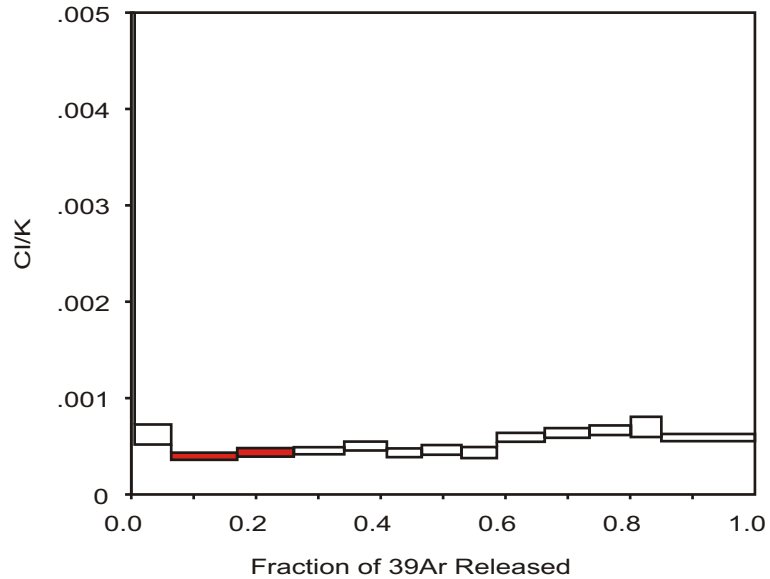

A23

34RAP FS#L1 Age Spectrum

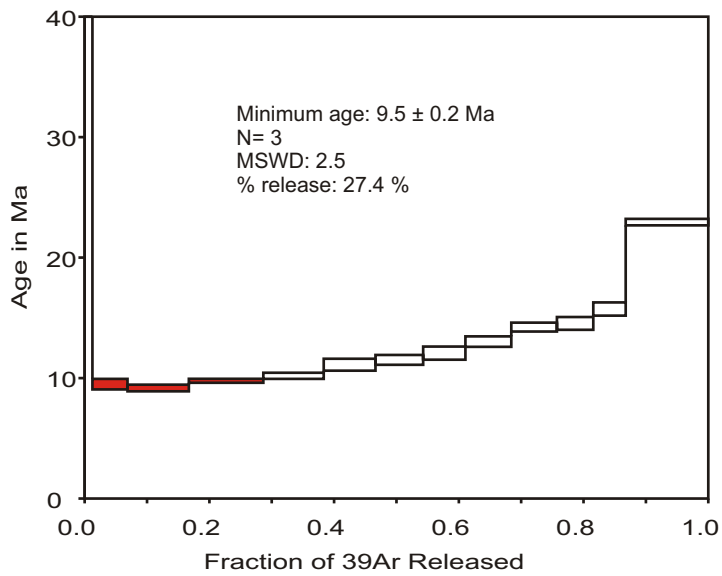

34RAP FS#L1 Ca/K

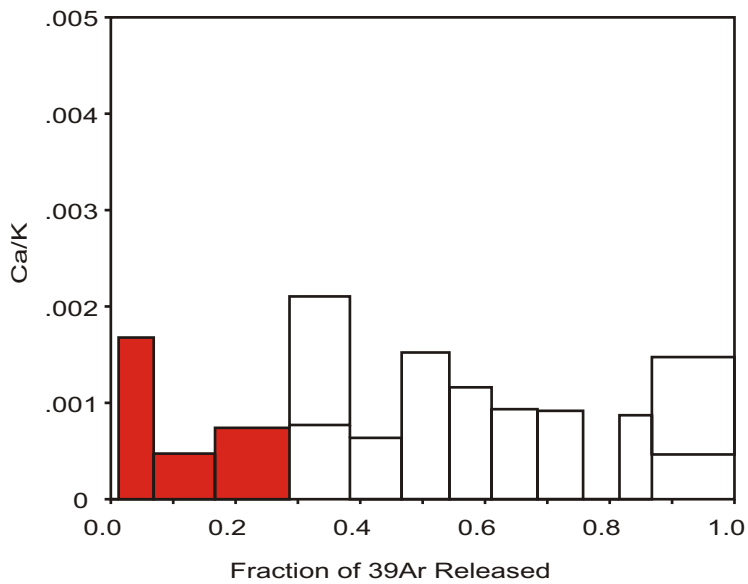

34RAP FS#L1 Cl/K

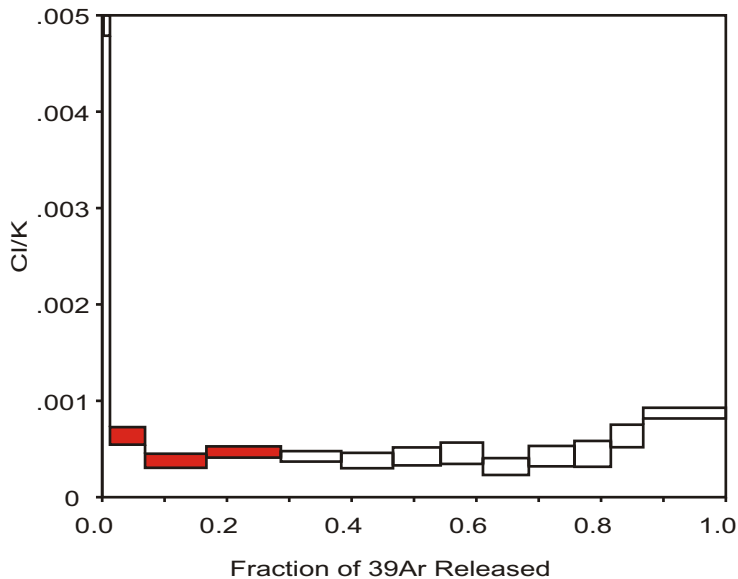

**A24**



40RAP FS#L1 Age Spectrum

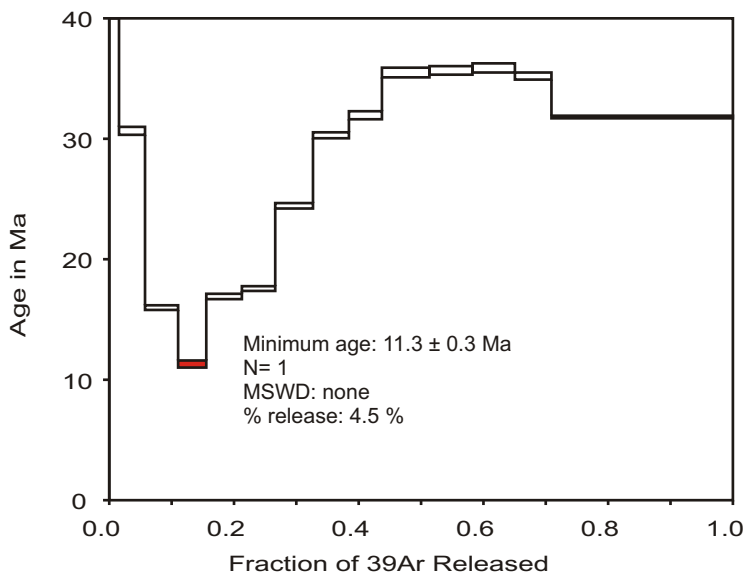

40RAP FS#L1 Ca/K

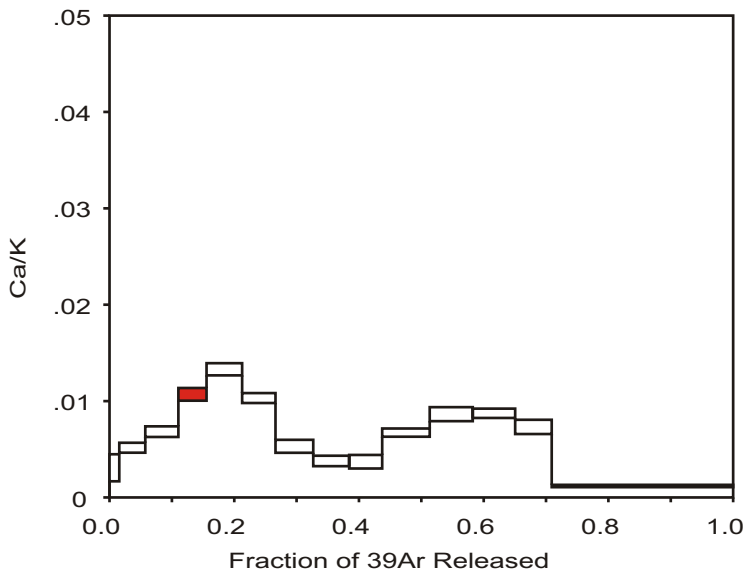

40RAP FS#L1 Cl/K

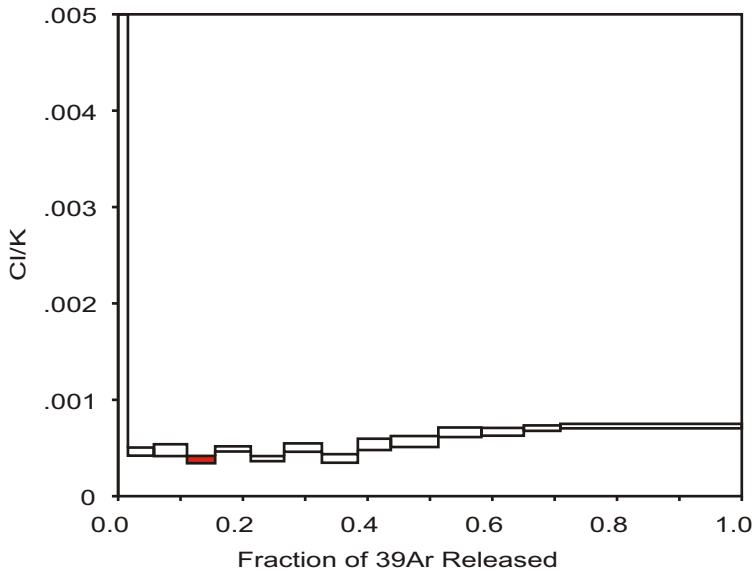

**A25**

43RAP FS#L1 Age Spectrum

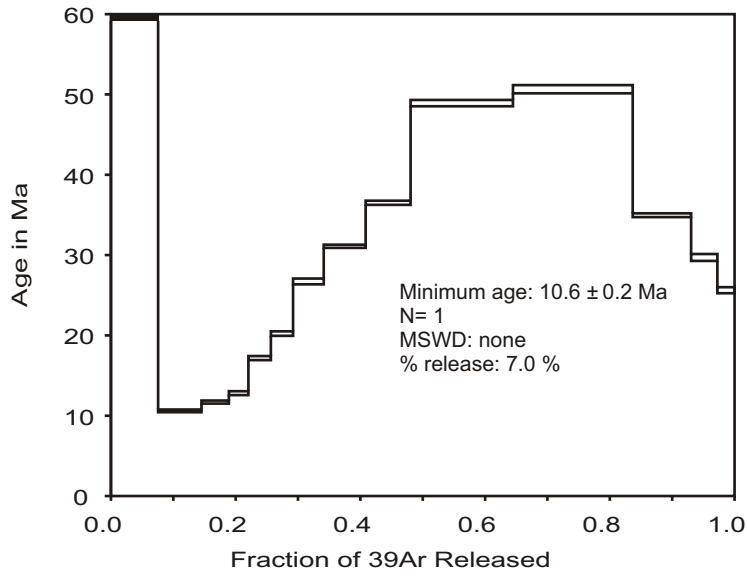

43RAP FS#L1 Ca/K

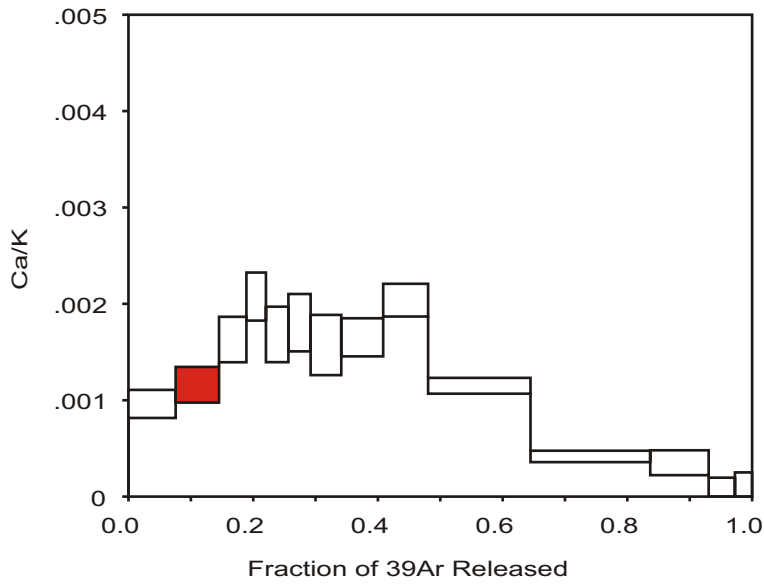

43RAP FS#L1 Cl/K

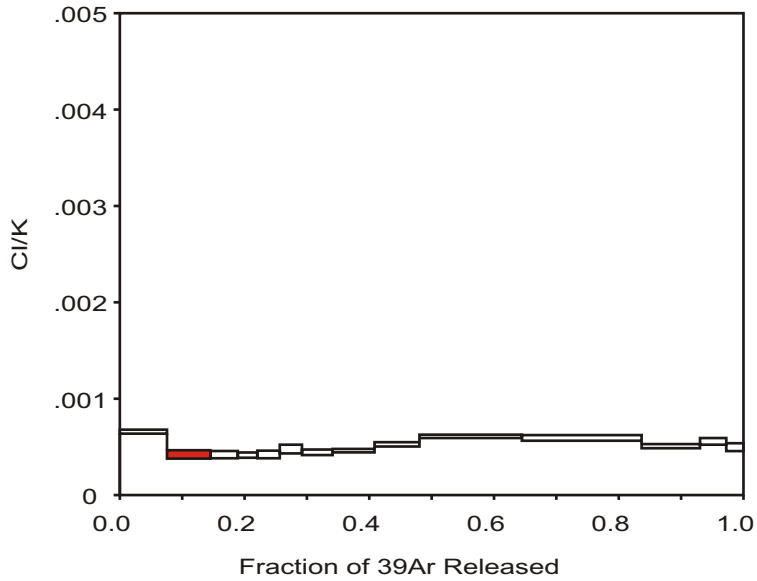

**A26**

72DT44A FS#F1 Age Spectrum

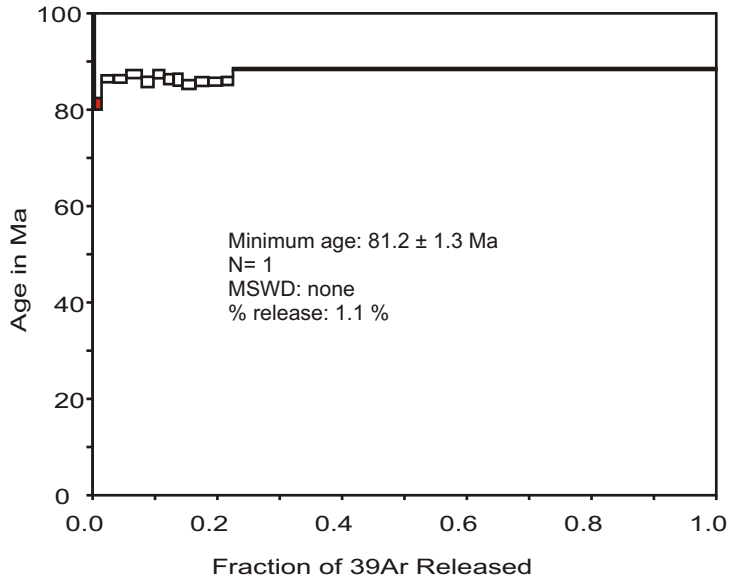

72DT44A FS#F1 Ca/K

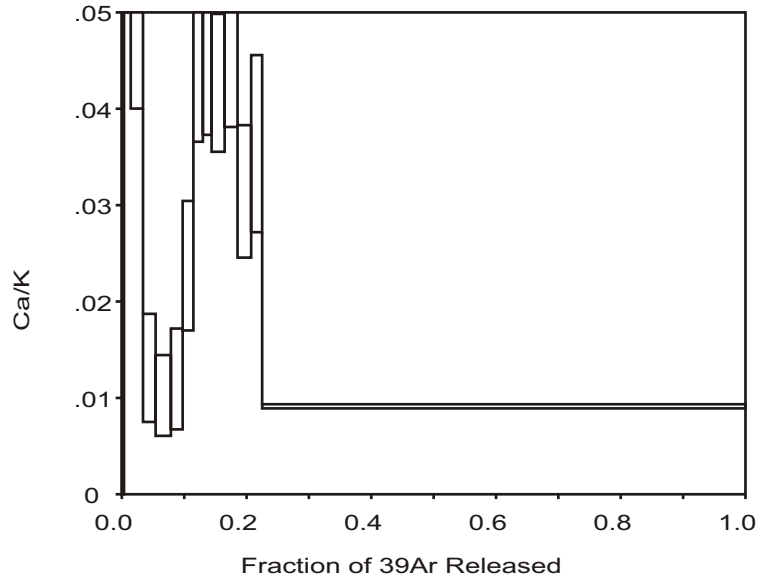

72DT44A FS#F1 Cl/K

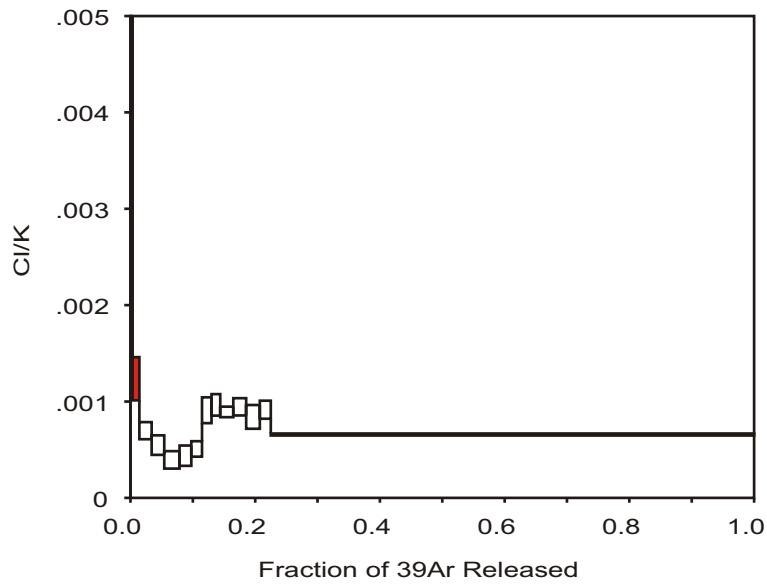

A27

72DT43B FS#F1 Age Spectrum

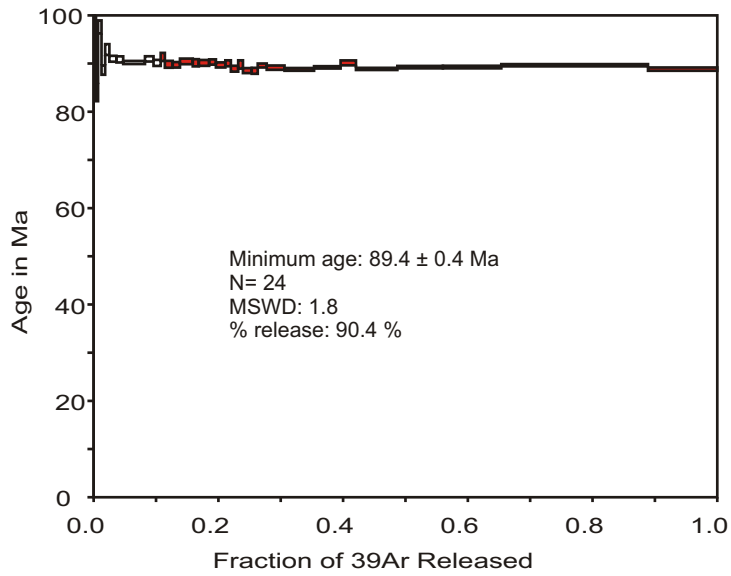

72DT43B FS#F1 Ca/K

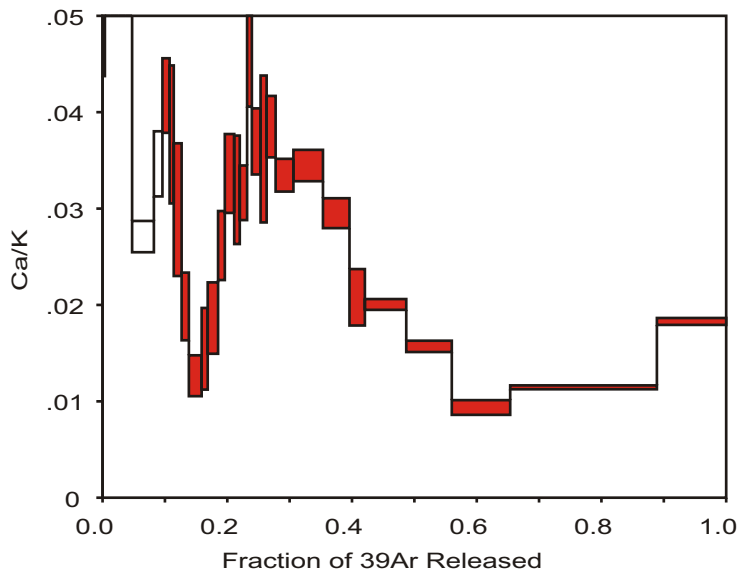

72DT43B FS#F1 Cl/K

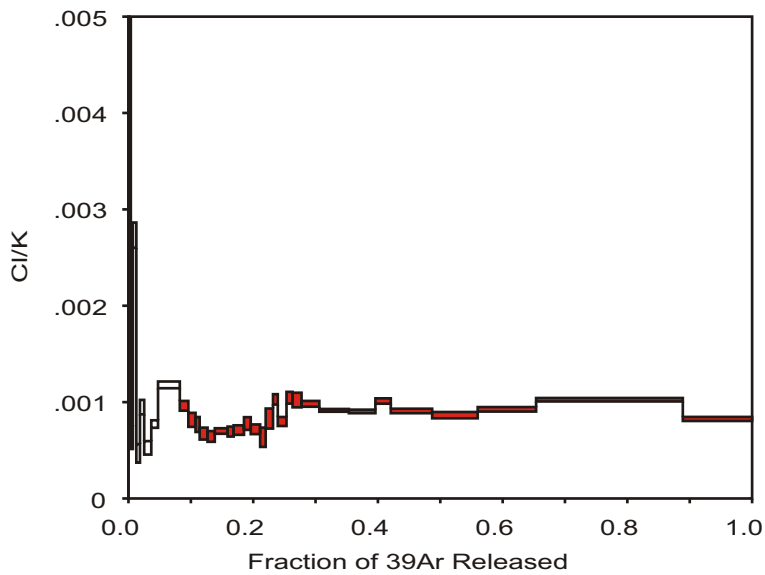

A28

71AWR479 FS#L1 Age Spectrum

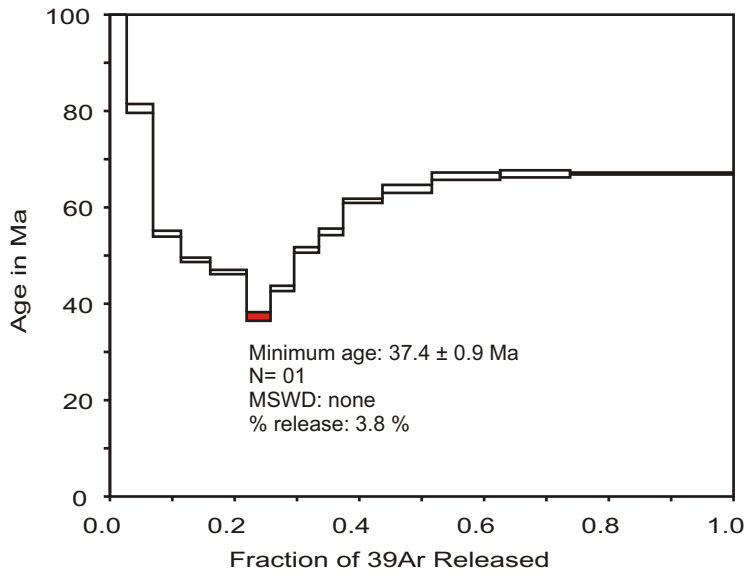

71AWR479 FS#L1 Ca/K

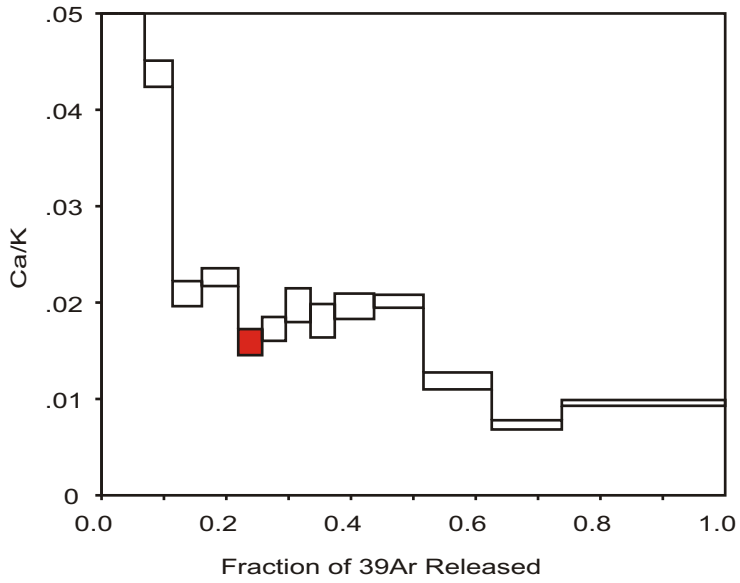

71AWR479 FS#L1 Cl/K

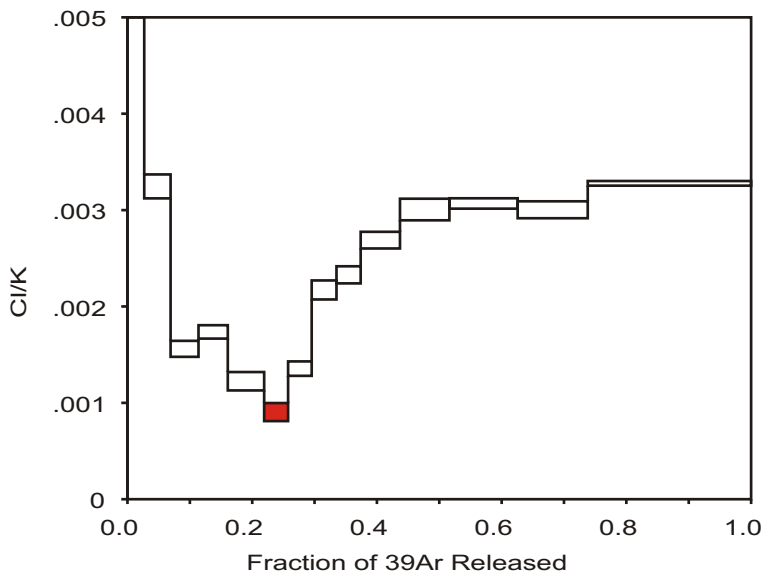

**A29**

71AWR480 FS#L1 Age Spectrum

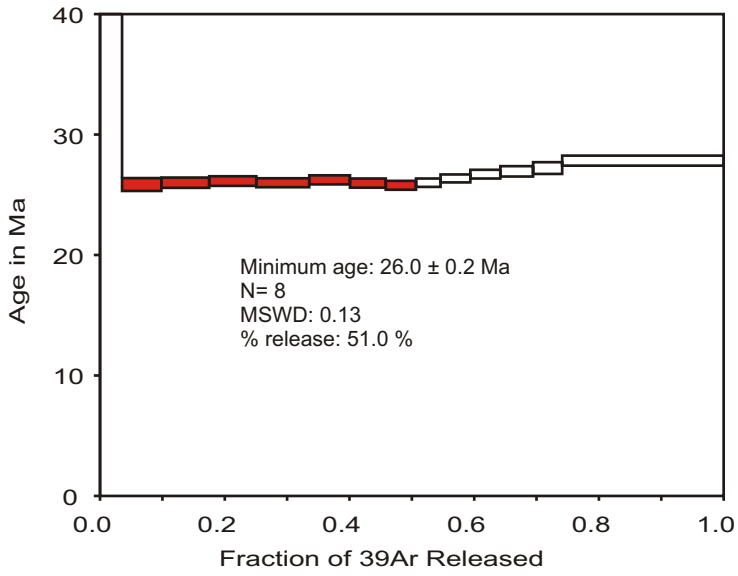

71AWR480 FS#L1 Isochron

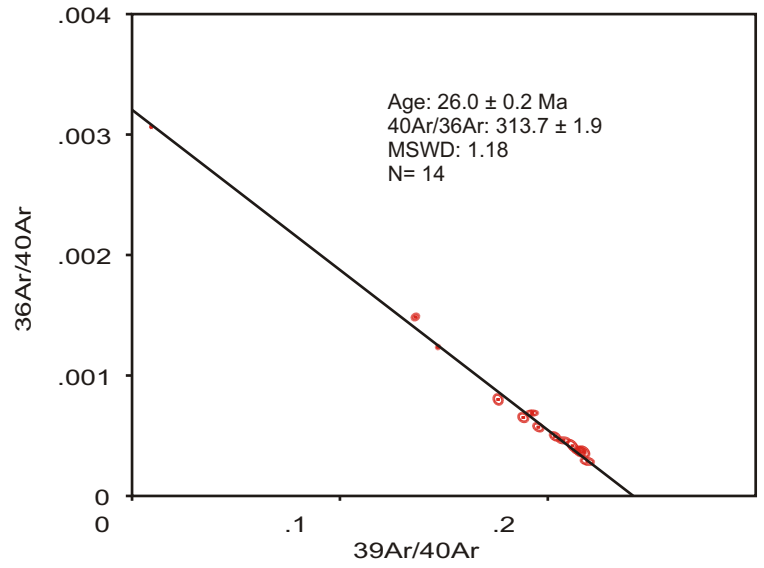

71AWR480 FS#L1 Ca/K

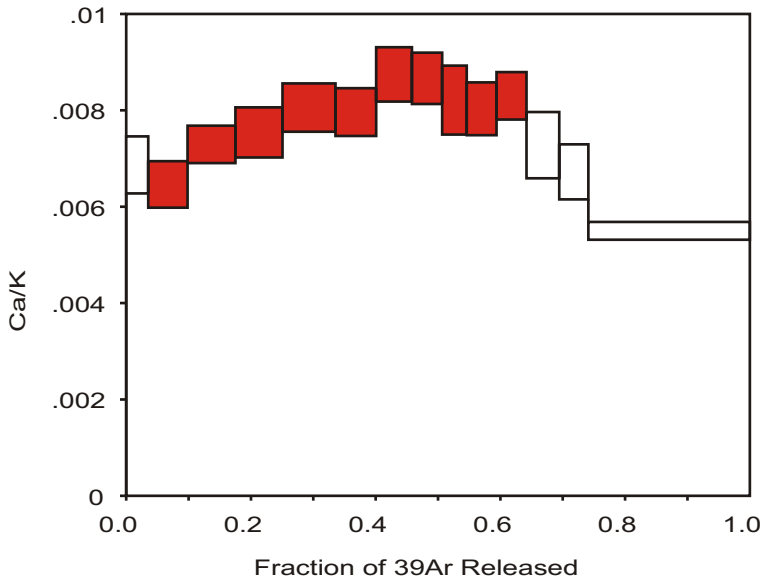

71AWR480 FS#L1 Cl/K

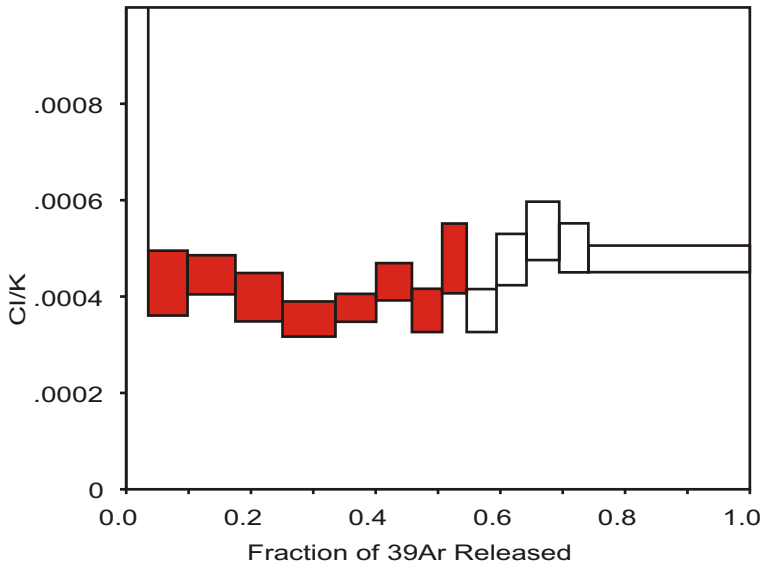

A30

72DT37B FS#L1 Age Spectrum

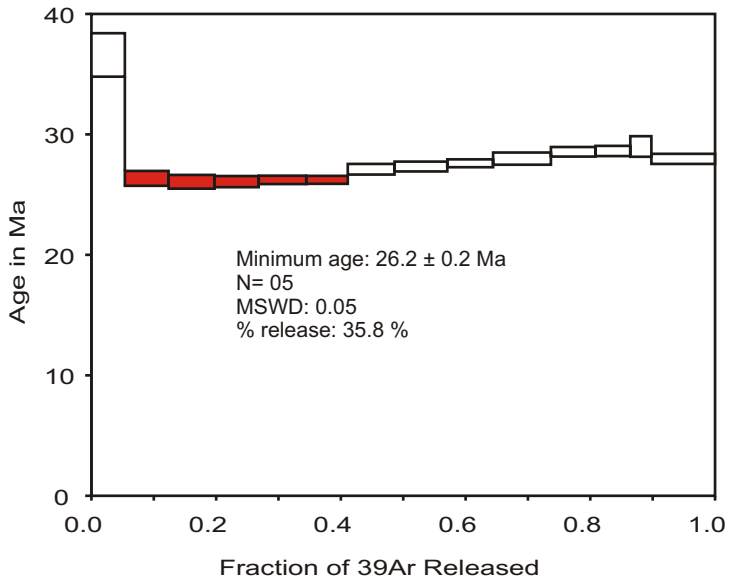

72DT37B FS#L1 Isochron

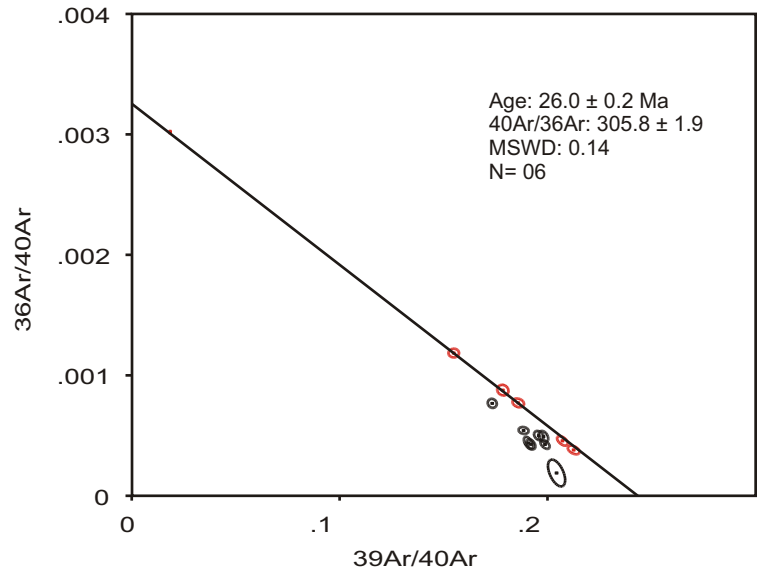

DT7237B FS#L1 Ca/K

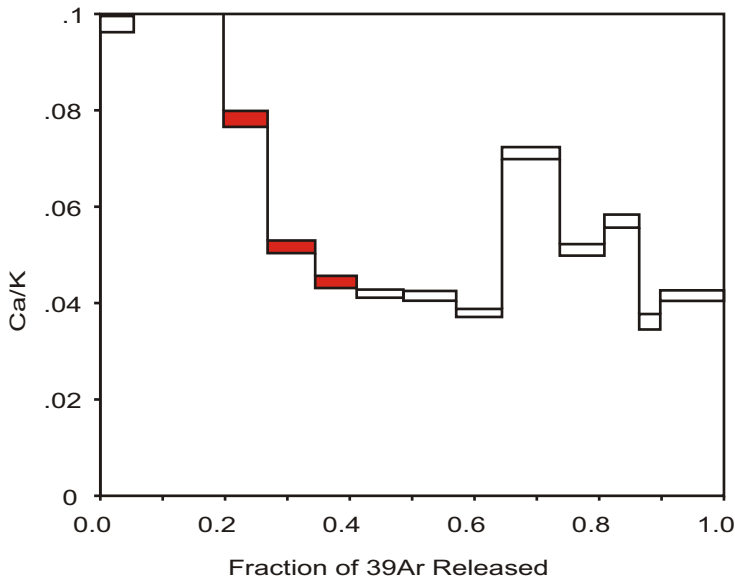

DT7237B FS#L1 Cl/K

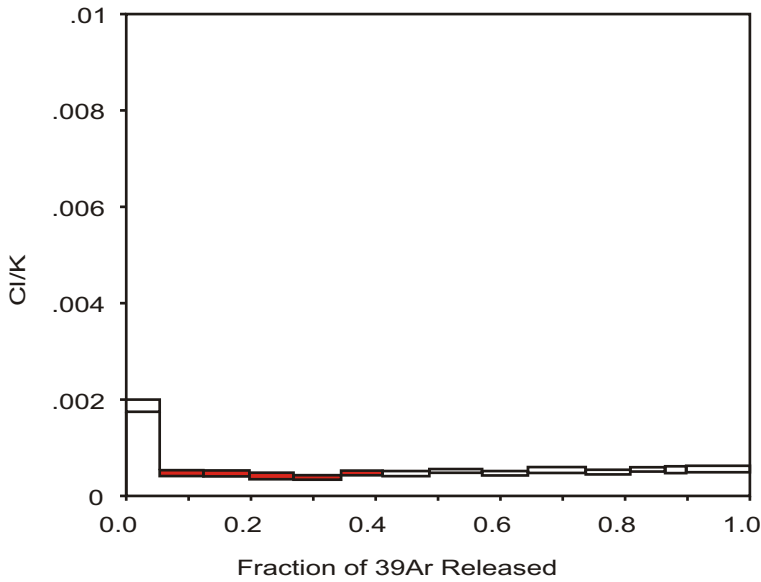

**A31**

72DT40 FS#L1 Age Spectrum

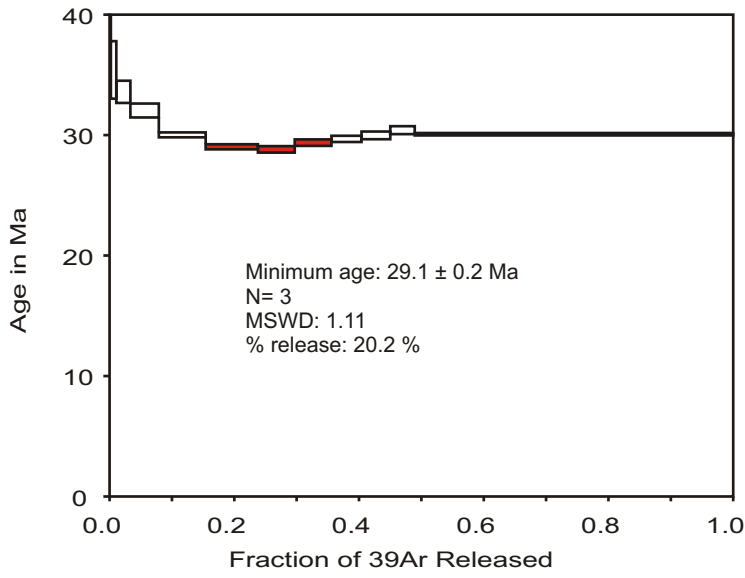

72DT40 FS#L1 Isochron

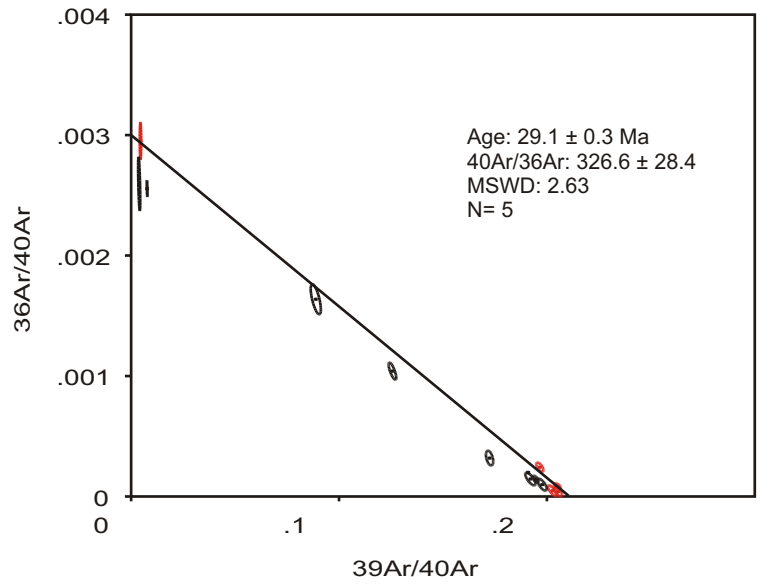

72DT40 FS#L1 Ca/K

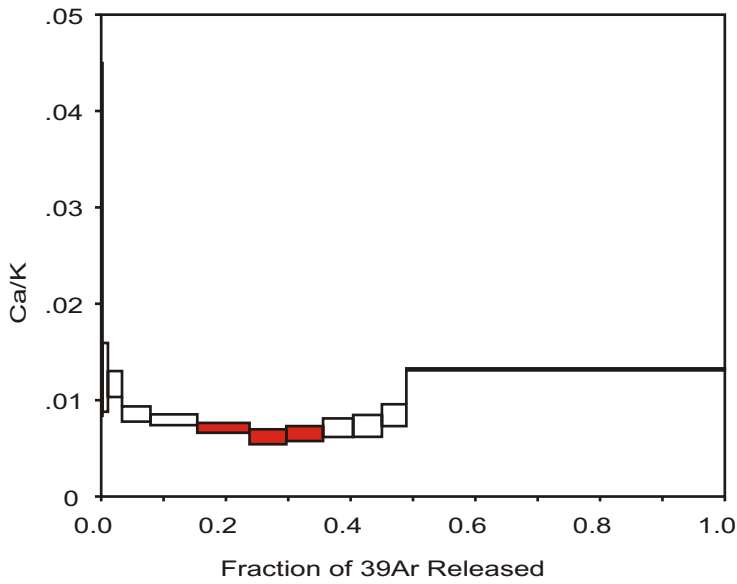

72DT40 FS#L1 Cl/K

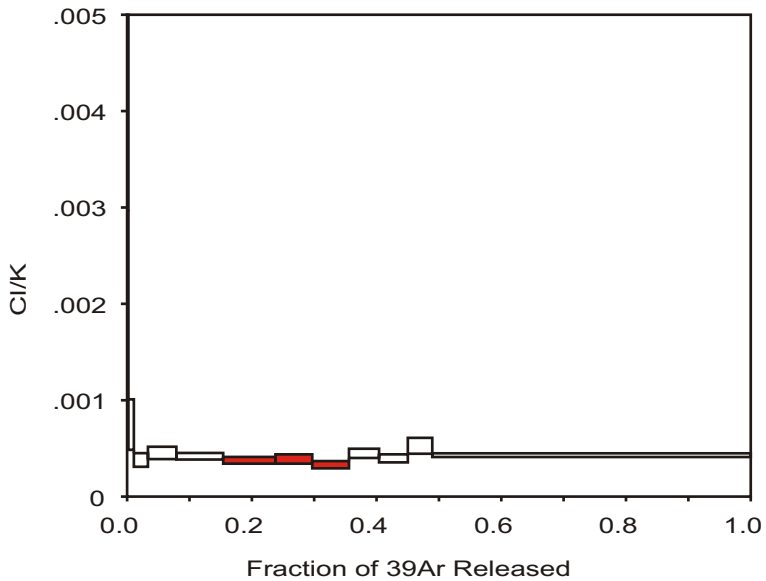

**A32**



60COL FS#L1 Age Spectrum

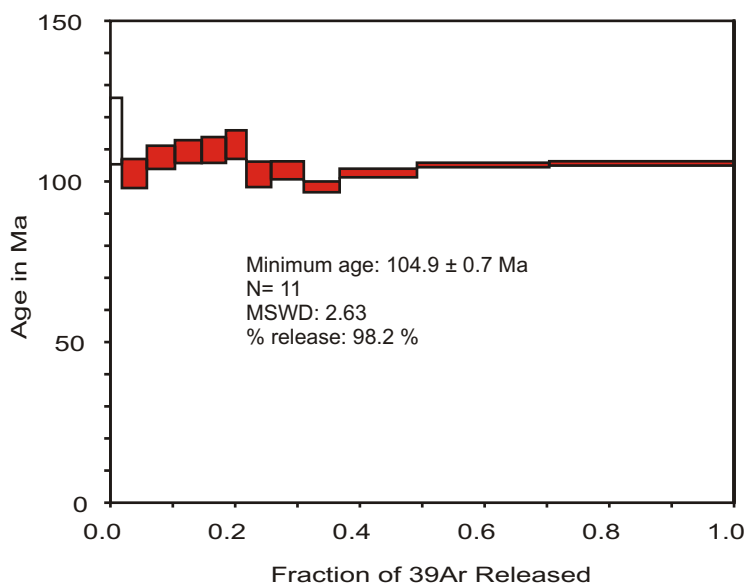

60COL FS#L1 Isochron

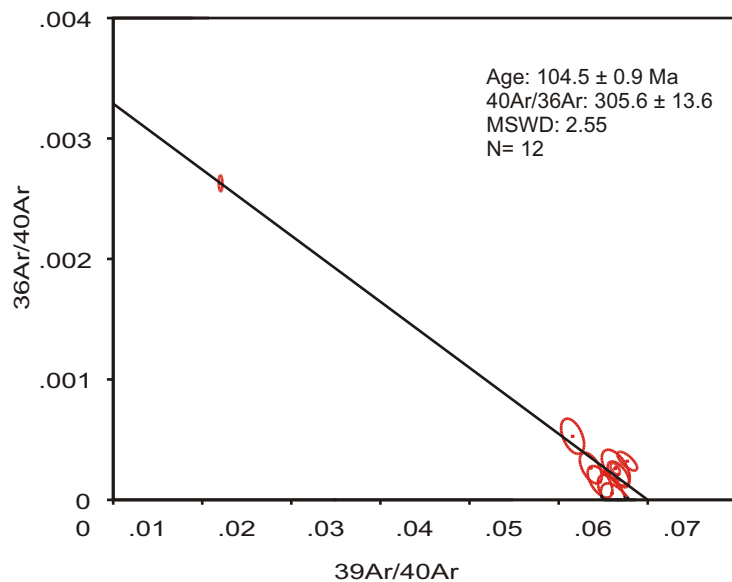

60COL FS#L1 Ca/K

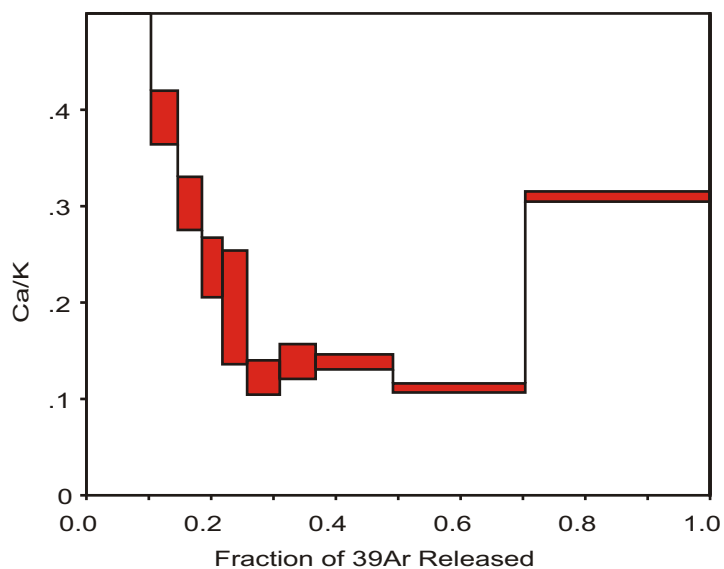

60COL FS#L1 Cl/K

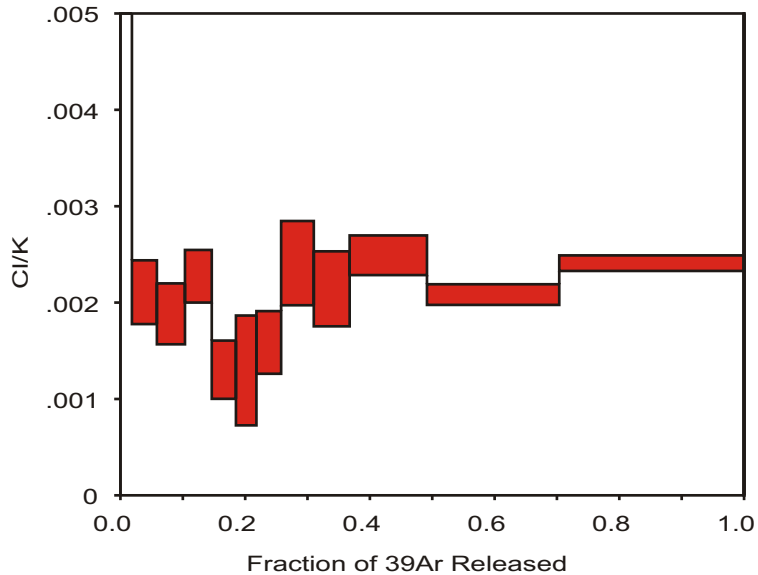

A33

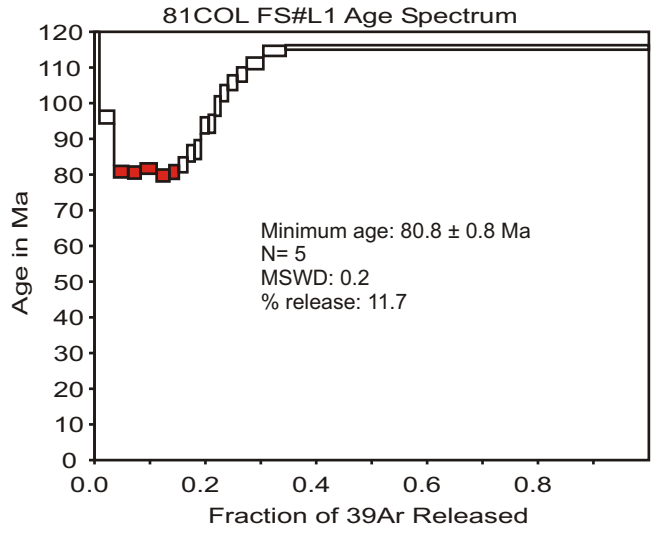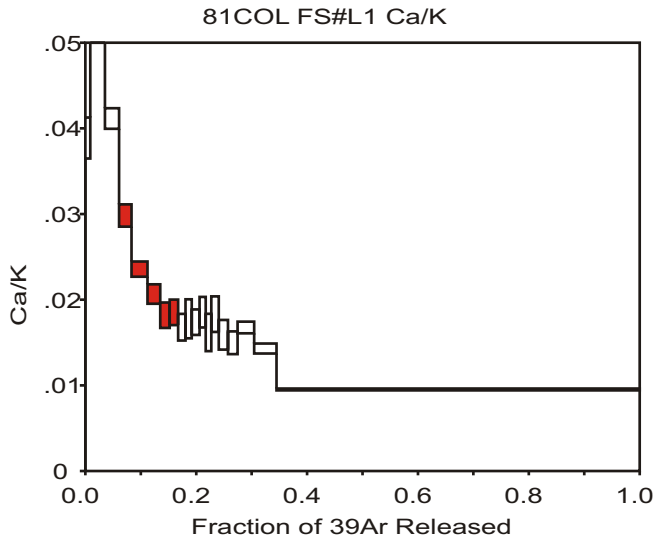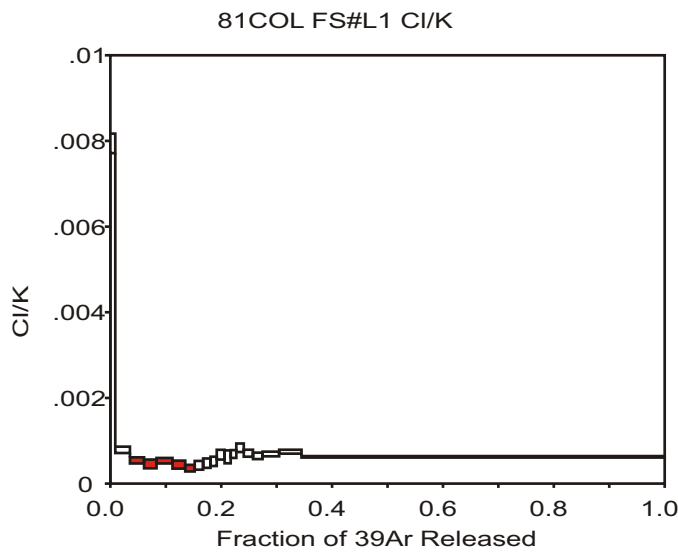

**A34**

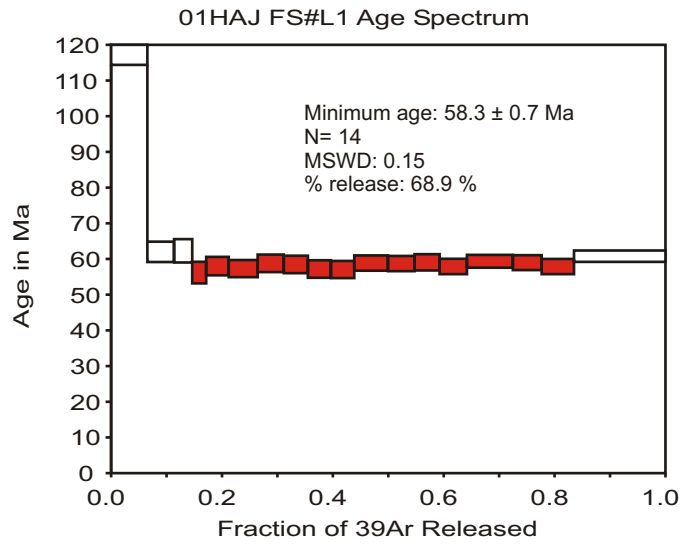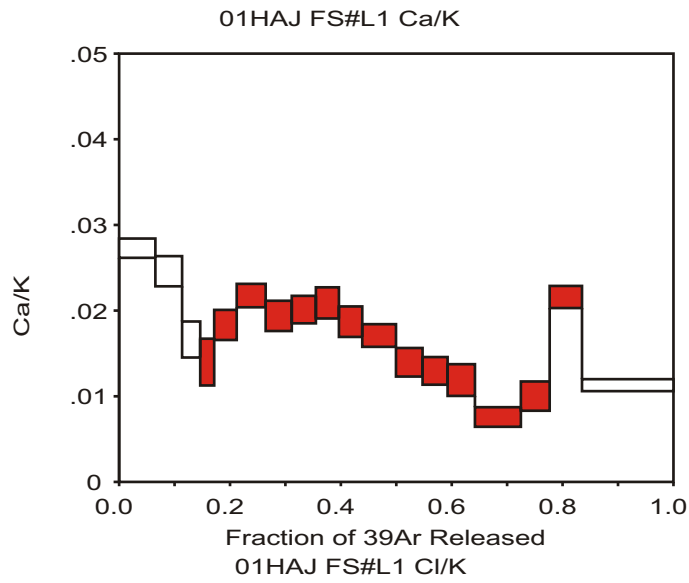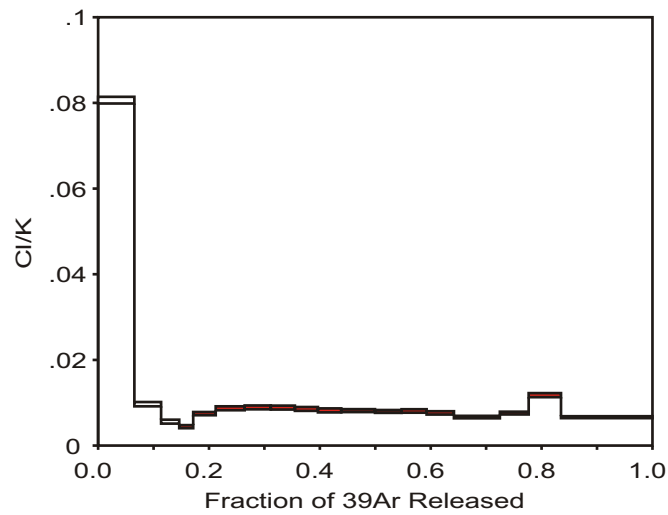

**A35**

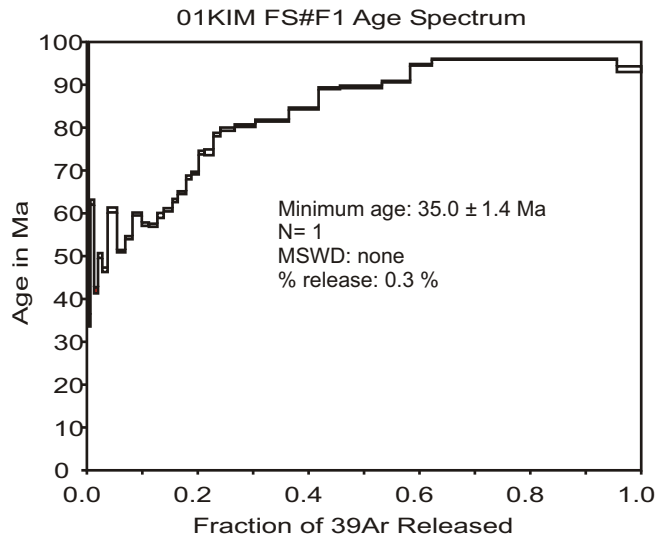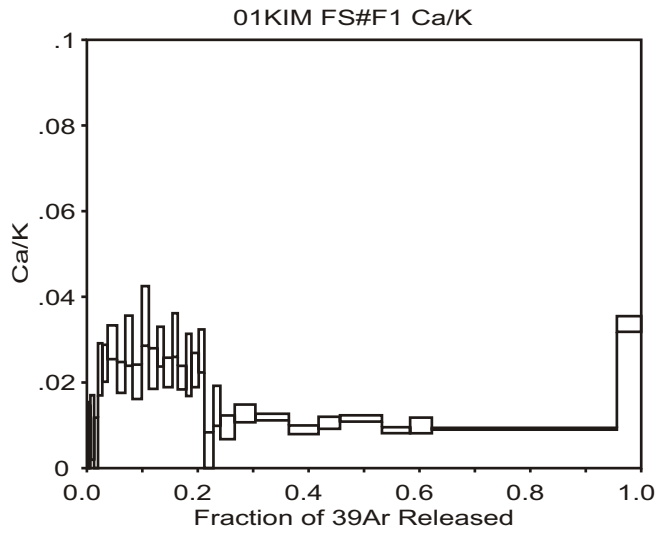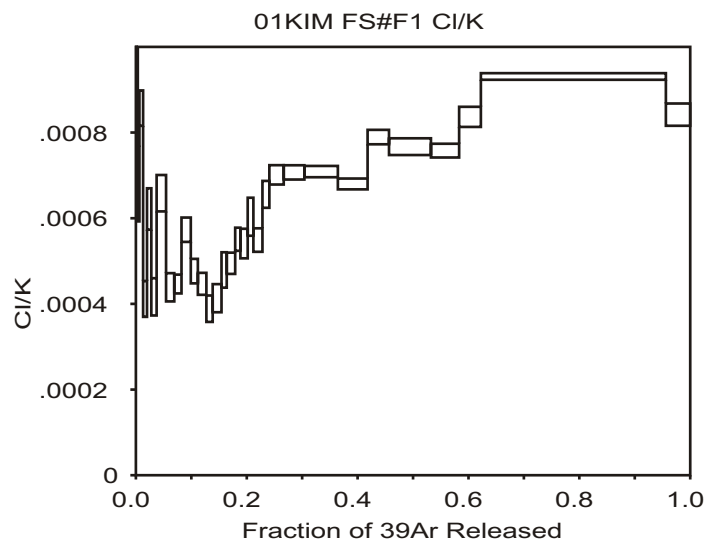

**A36**
